# Supplementary material for: Synthesis and Biological Evaluation of Piperazine Hybridized Coumarin Indolylcyanoenones with Antibacterial Potential
Source: MDPI journal article supplement (doi:10.3390/molecules28062511), 2023-03-09

## 1. The molecular docking results

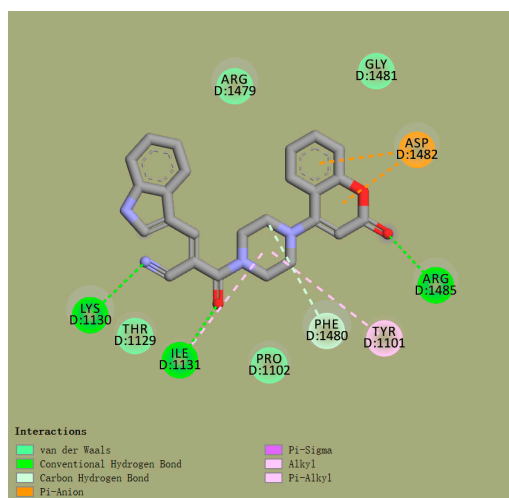

Figure S1. 2D image of DNA gyrase docked with **5a**

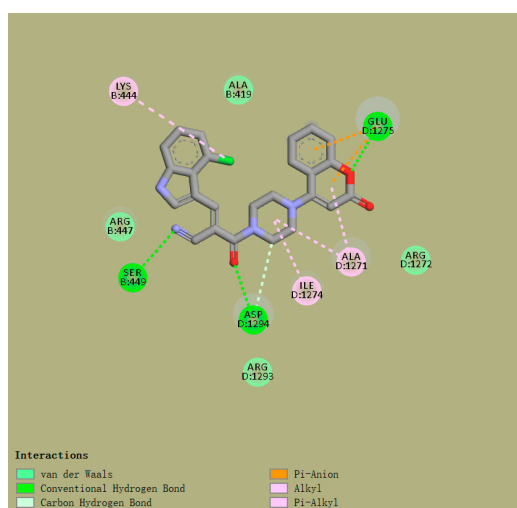

Figure S2. 2D image of DNA gyrase docked with **5b**

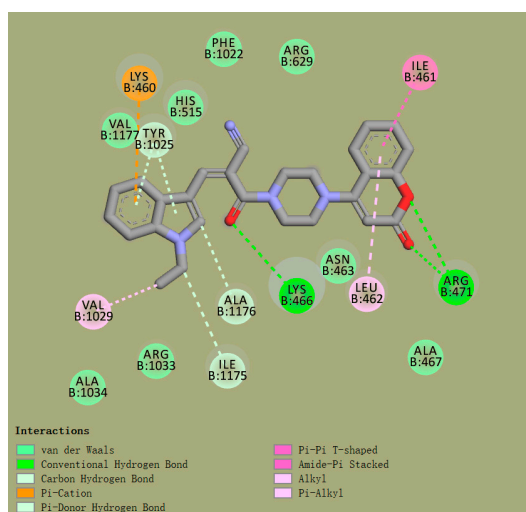

Figure S3. 2D image of DNA gyrase docked with **7a**

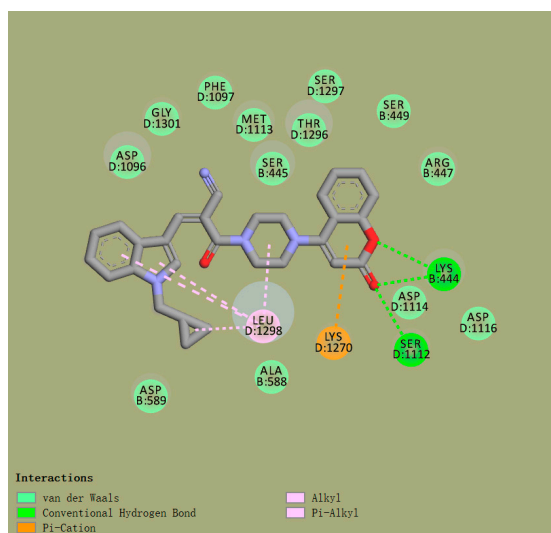

Figure S4. 2D image of DNA gyrase docked with **9a**

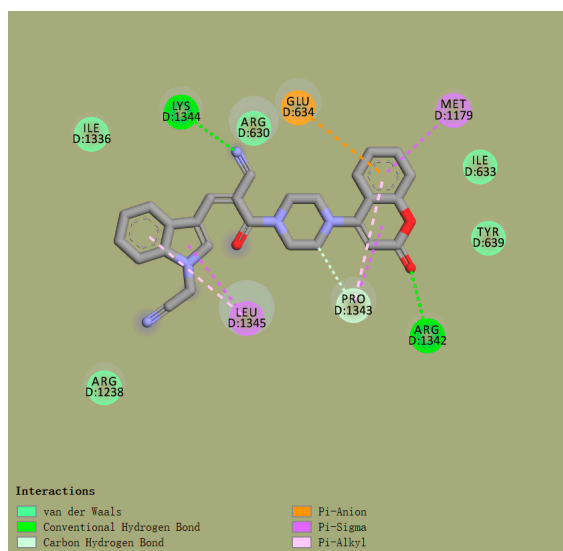

Figure S5. 2D image of DNA gyrase docked with **13a**

## 2. Characterizations of some representative compounds

### 2.1. Spectra of compound **3**

$^1\text{H}$  NMR spectrum (600 MHz, 25 °C, DMSO- $d_6$ )

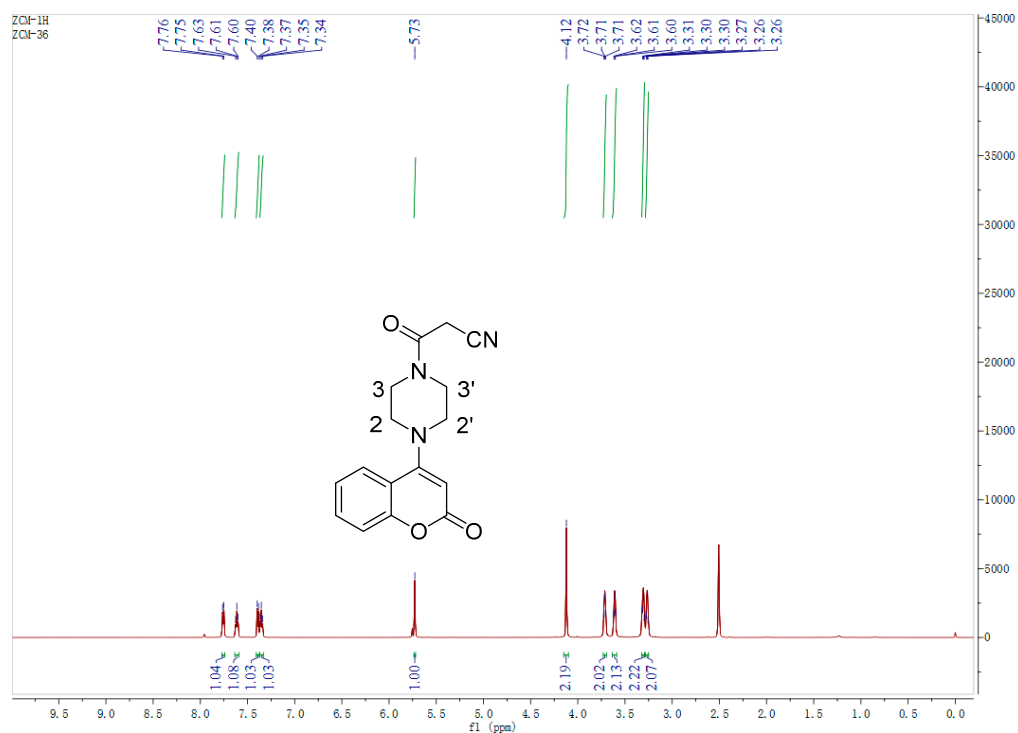

## HRMS spectrum

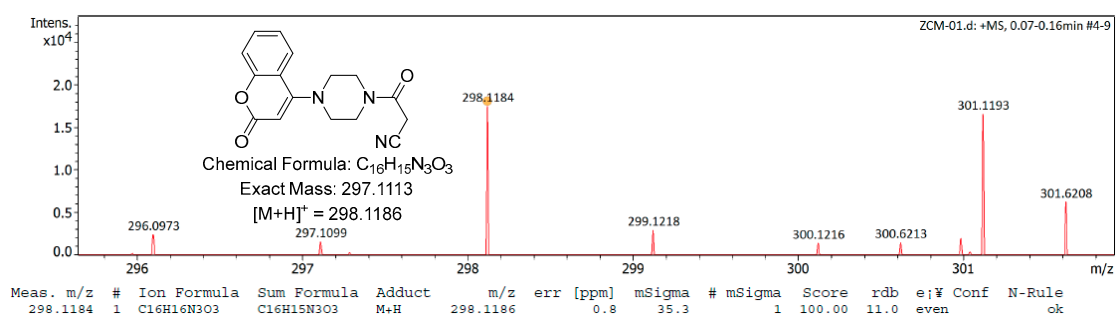

## 2.2. Spectra of compound **5a**

<sup>1</sup>H NMR spectrum (600 MHz, 25 °C, DMSO-*d*<sub>6</sub>)

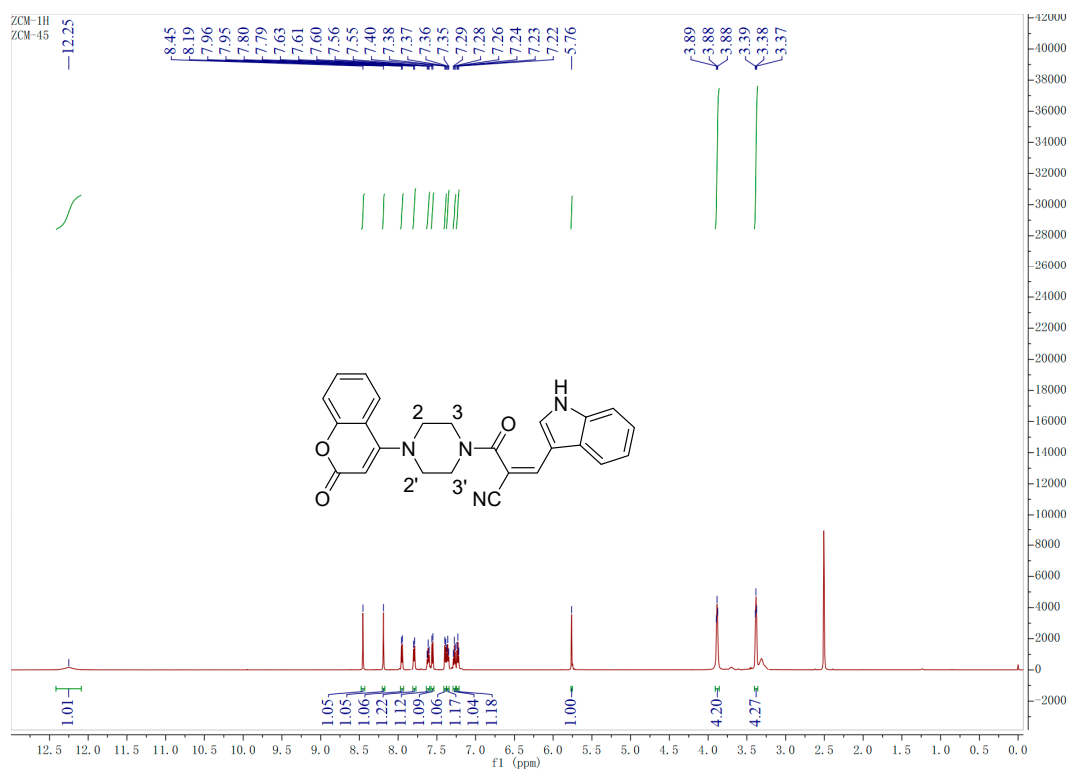

<sup>13</sup>C NMR spectrum (151 MHz, 25 °C, DMSO-*d*<sub>6</sub>)

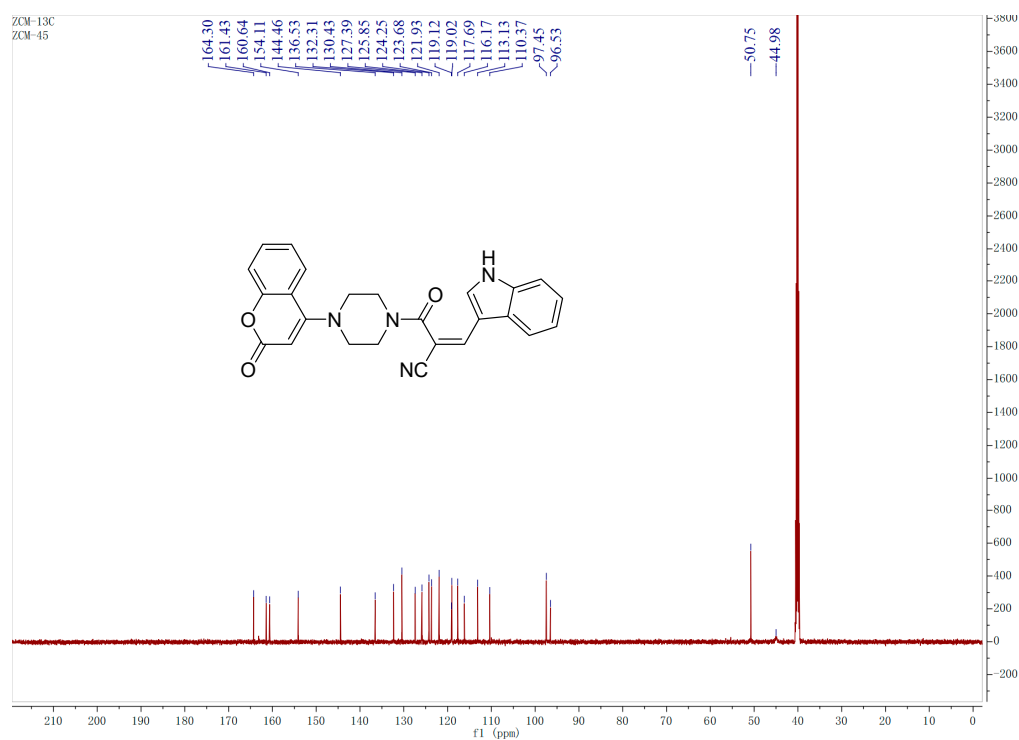

HRMS spectrum

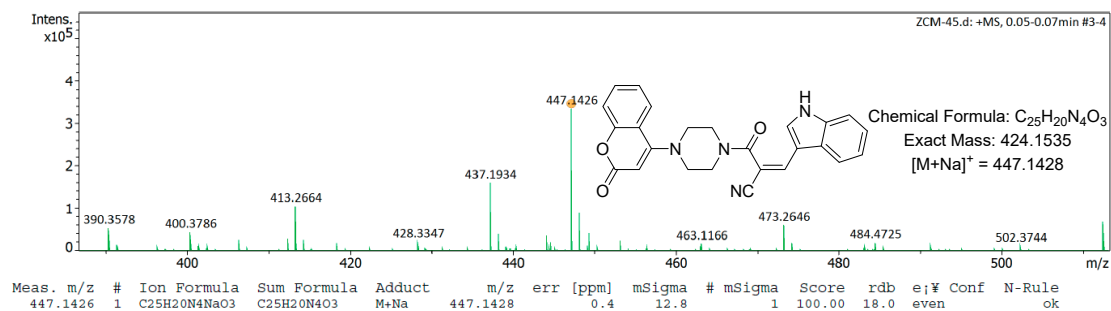

## 2.3. Spectra of compound **5b**

$^1H$  NMR spectrum (600 MHz, 25 °C,  $DMSO-d_6$ )

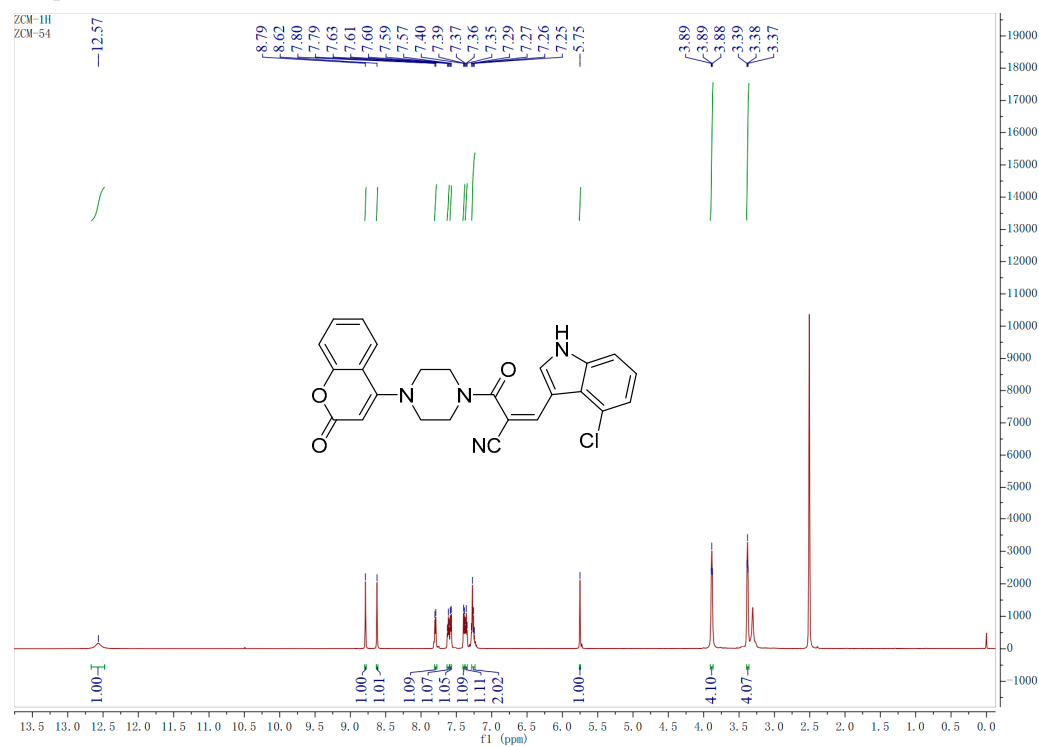

$^{13}C$  NMR spectrum (151 MHz, 25 °C,  $DMSO-d_6$ )

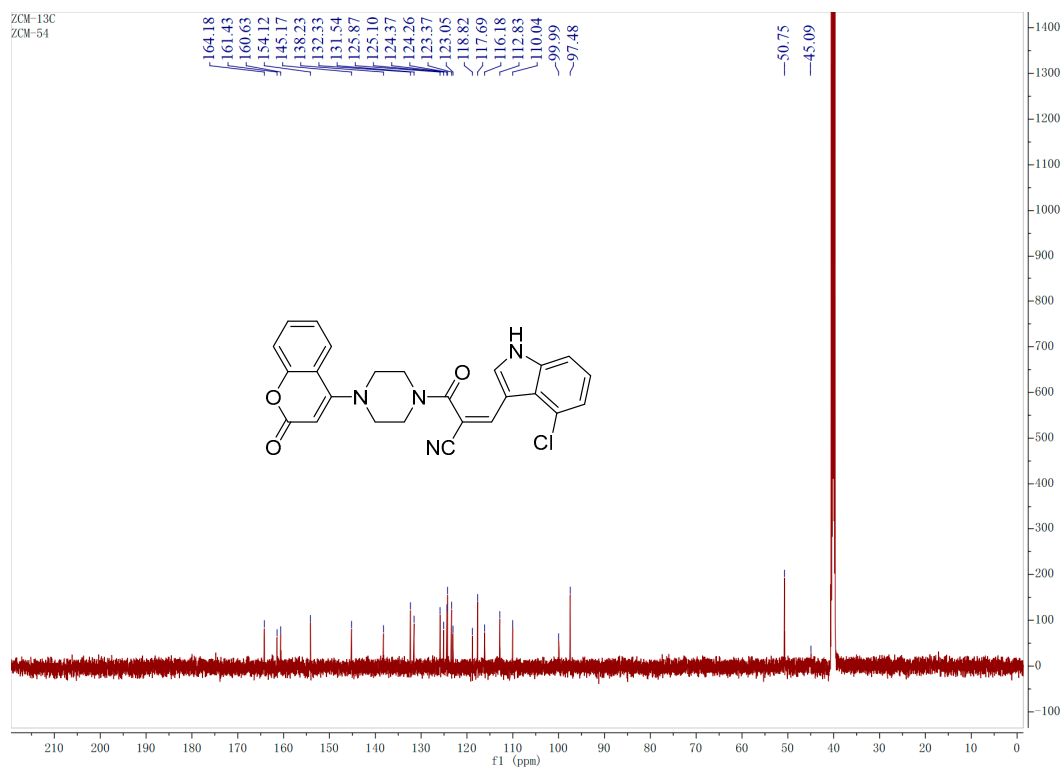

## HRMS spectrum

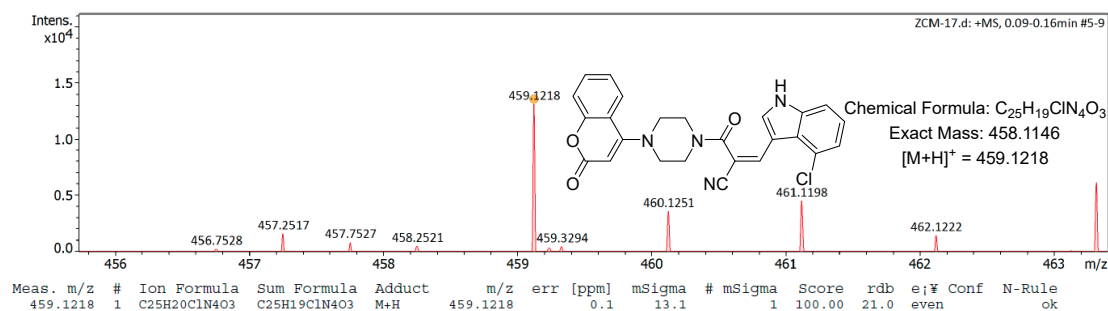

## 2.4. Spectra of compound 5c

<sup>1</sup>H NMR spectrum (600 MHz, 25 °C, DMSO-*d*<sub>6</sub>)

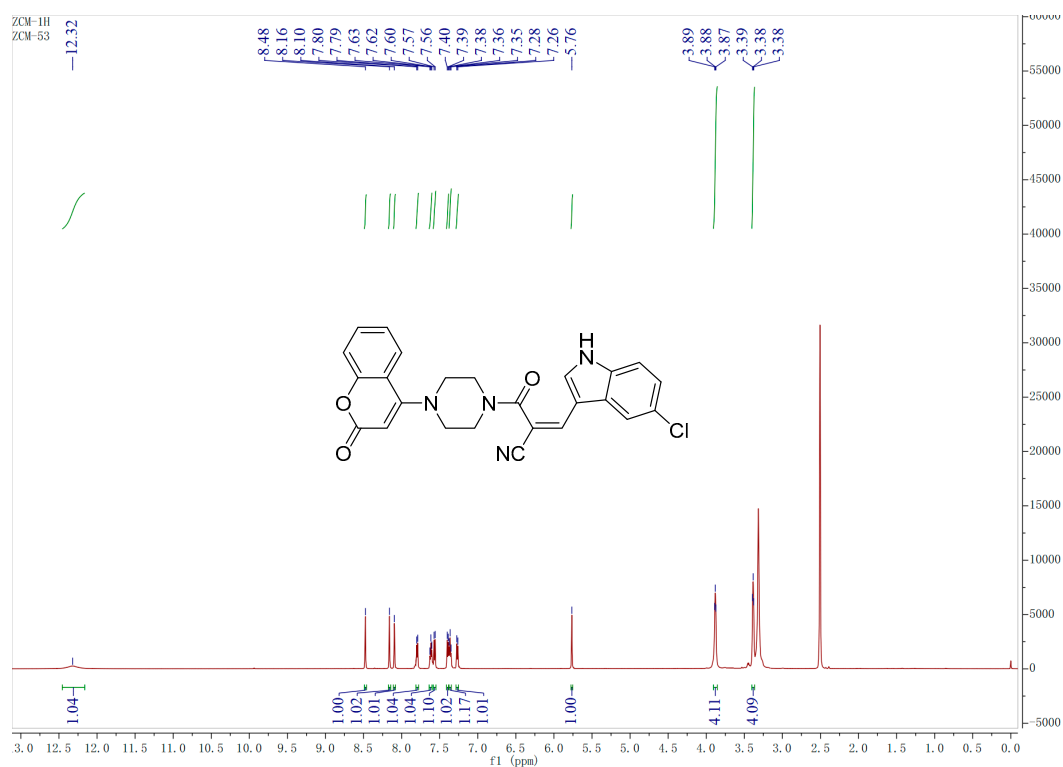

<sup>13</sup>C NMR spectrum (151 MHz, 25 °C, DMSO-*d*<sub>6</sub>)

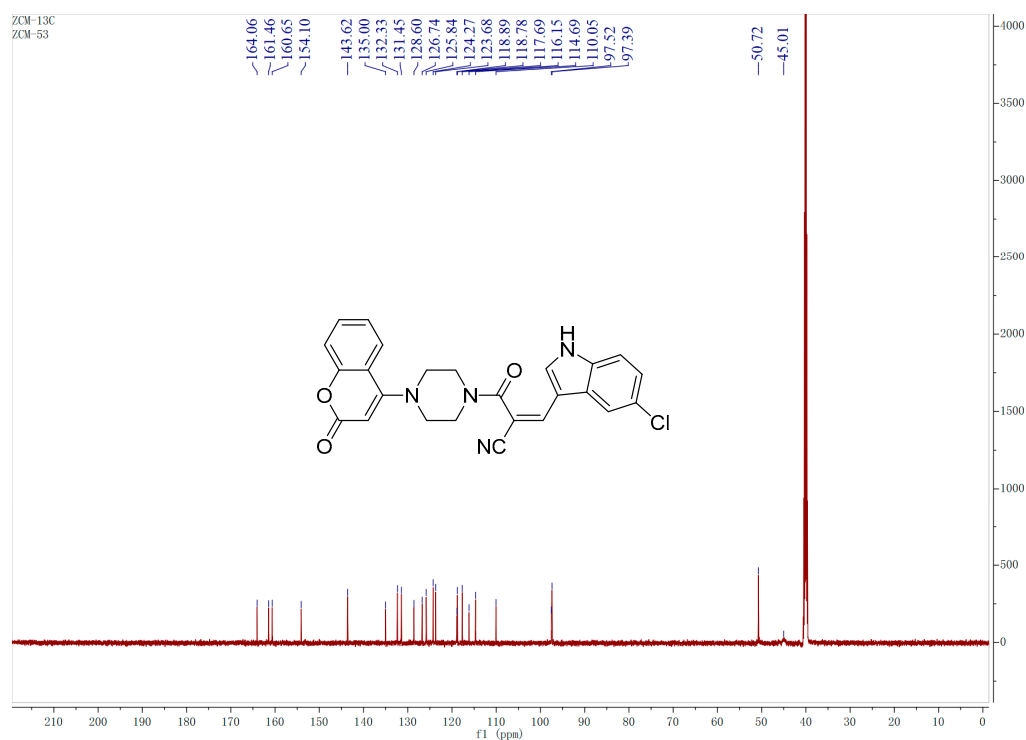

HRMS spectrum

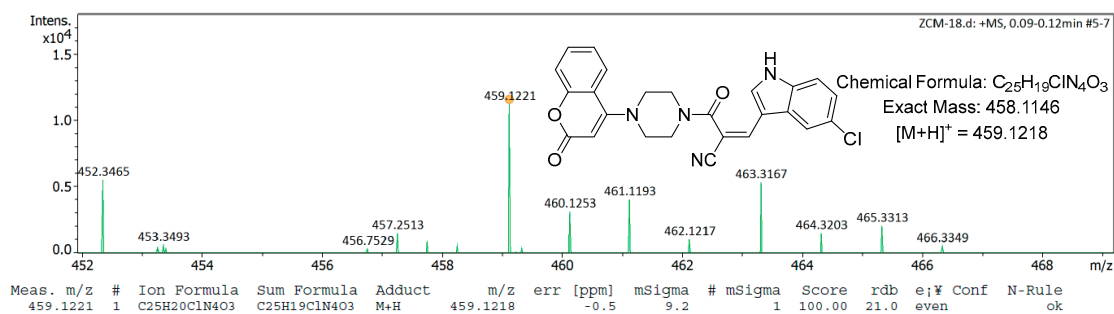

## 2.5. Spectra of compound 5d

$^1H$  NMR spectrum (600 MHz, 25 °C, DMSO- $d_6$ )

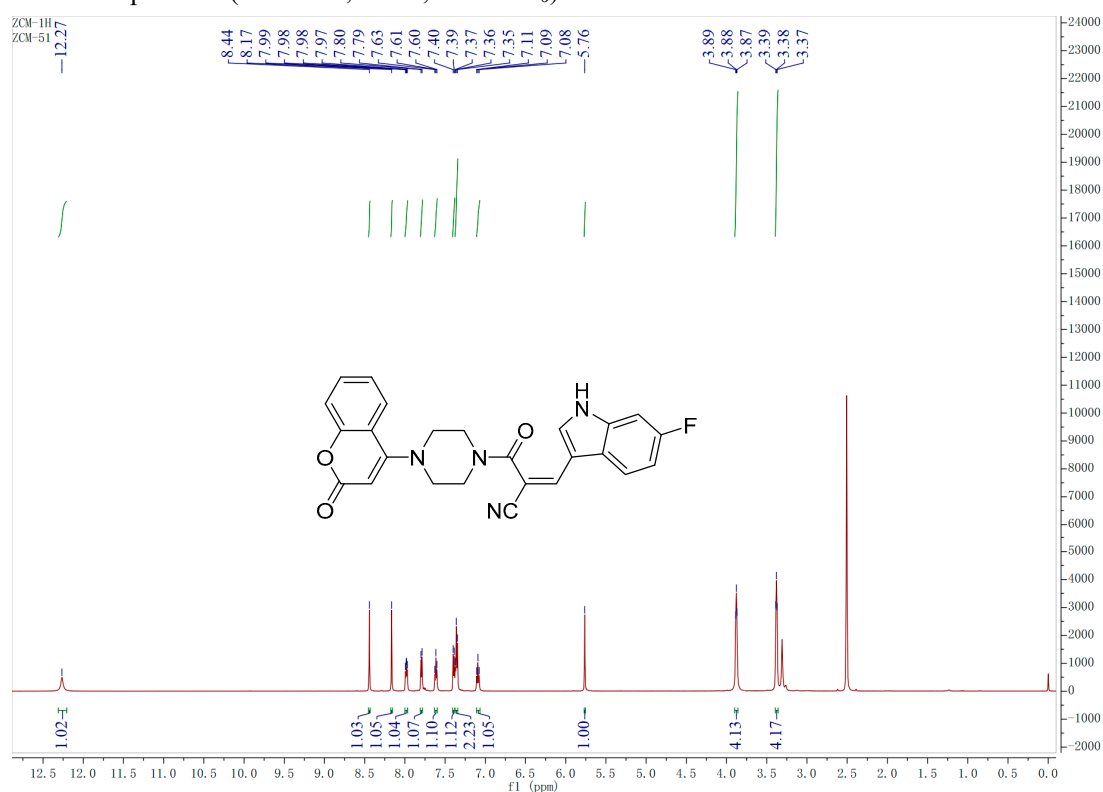

$^{13}C$  NMR spectrum (151 MHz, 25 °C, DMSO- $d_6$ )



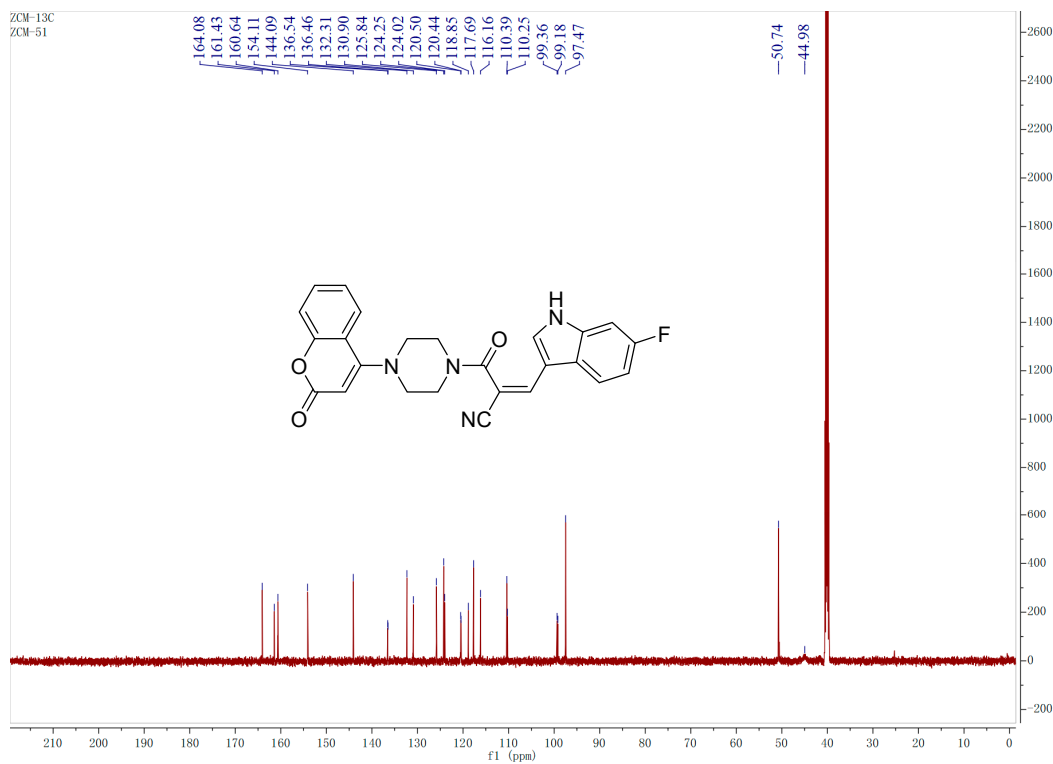

## HRMS spectrum

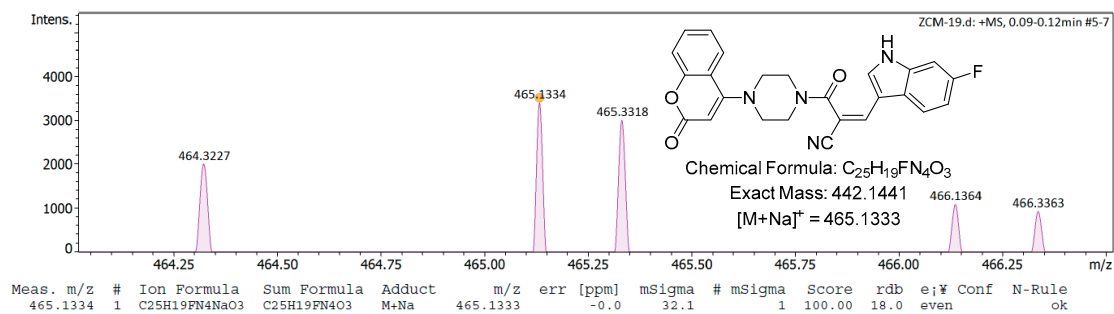

## 2.6. Spectra of compound **5e**

<sup>1</sup>H NMR spectrum (600 MHz, 25 °C, DMSO-*d*<sub>6</sub>)

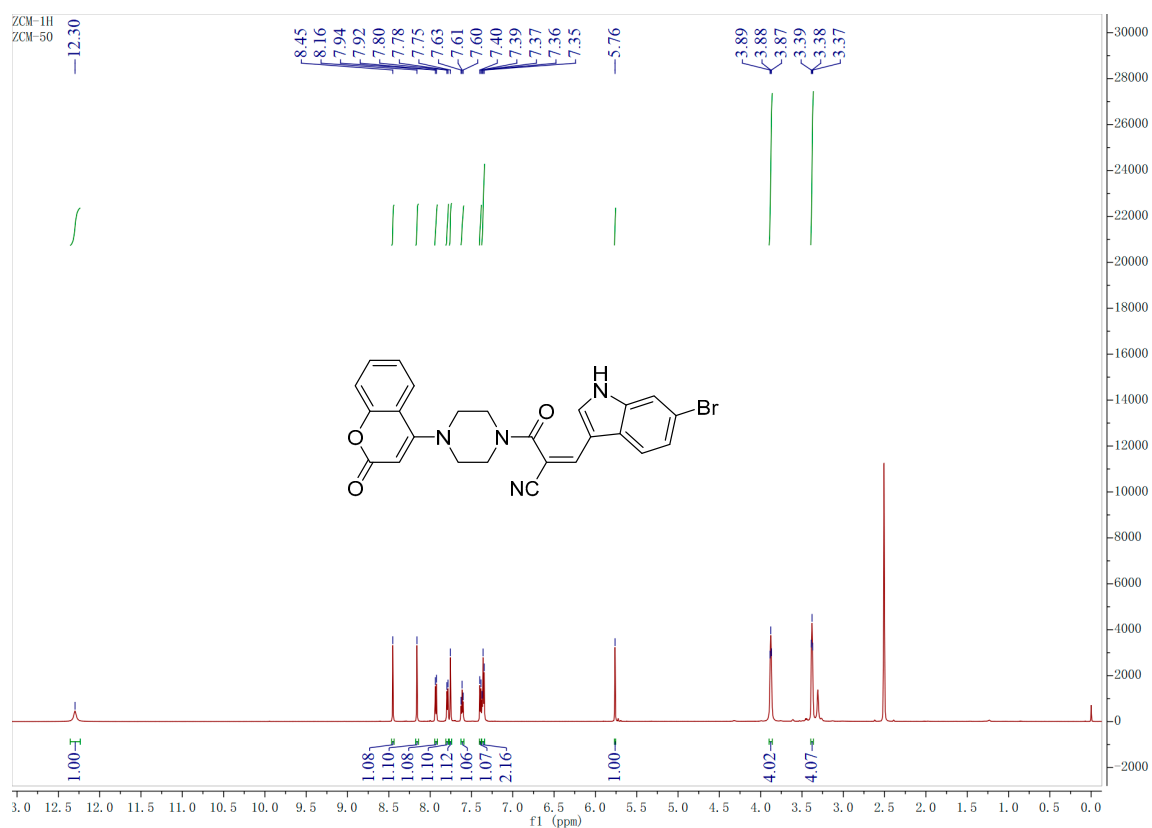

$^{13}\text{C}$  NMR spectrum (151 MHz, 25 °C, DMSO- $d_6$ )

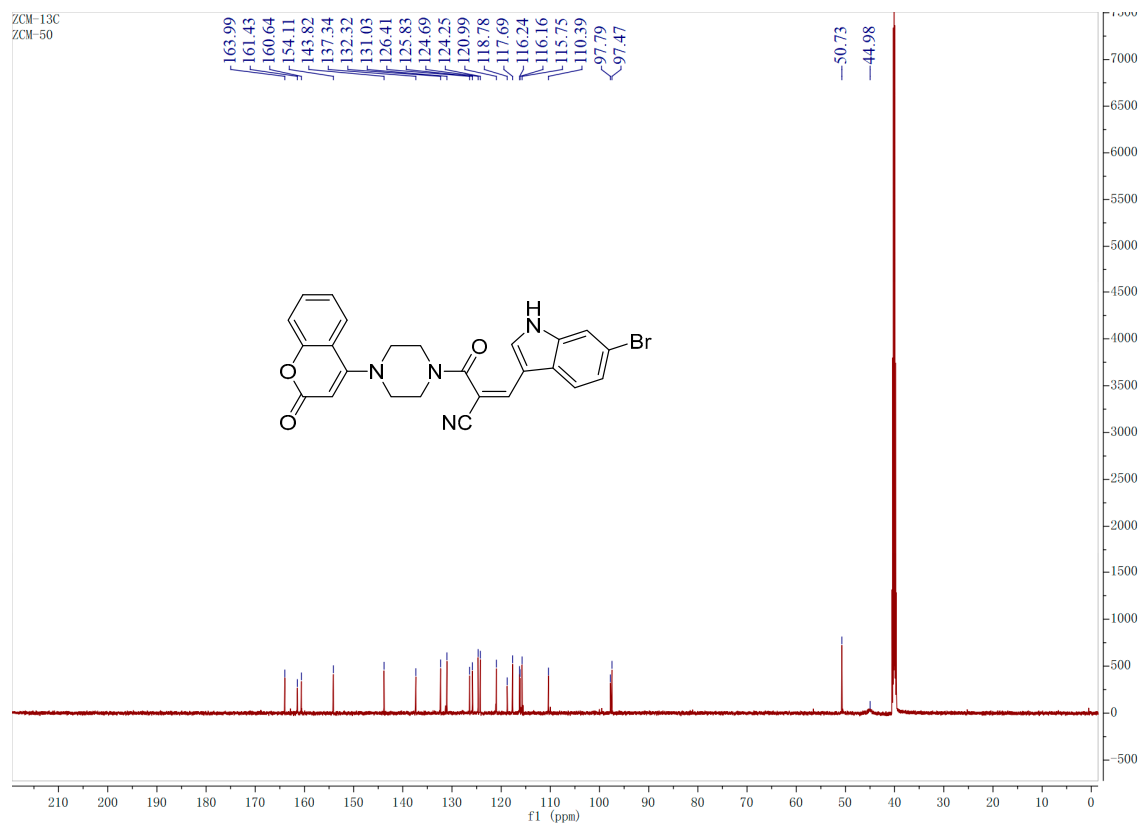

HRMS spectrum

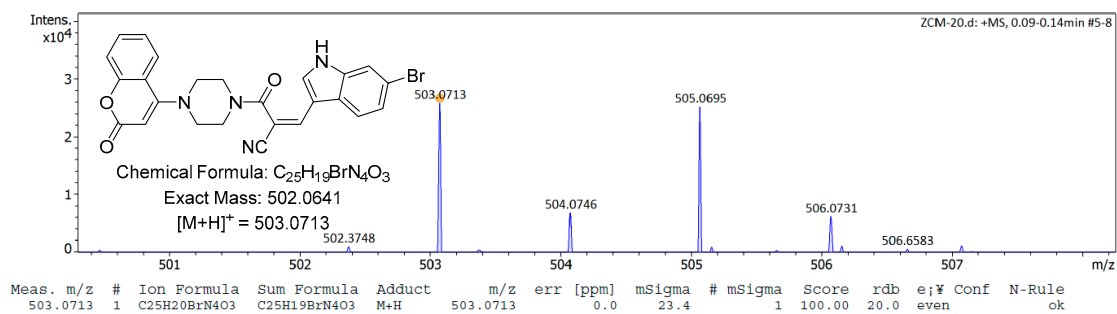

## 2.7. Spectra of compound **5f**

$^1H$  NMR spectrum (600 MHz, 25 °C, DMSO- $d_6$ )

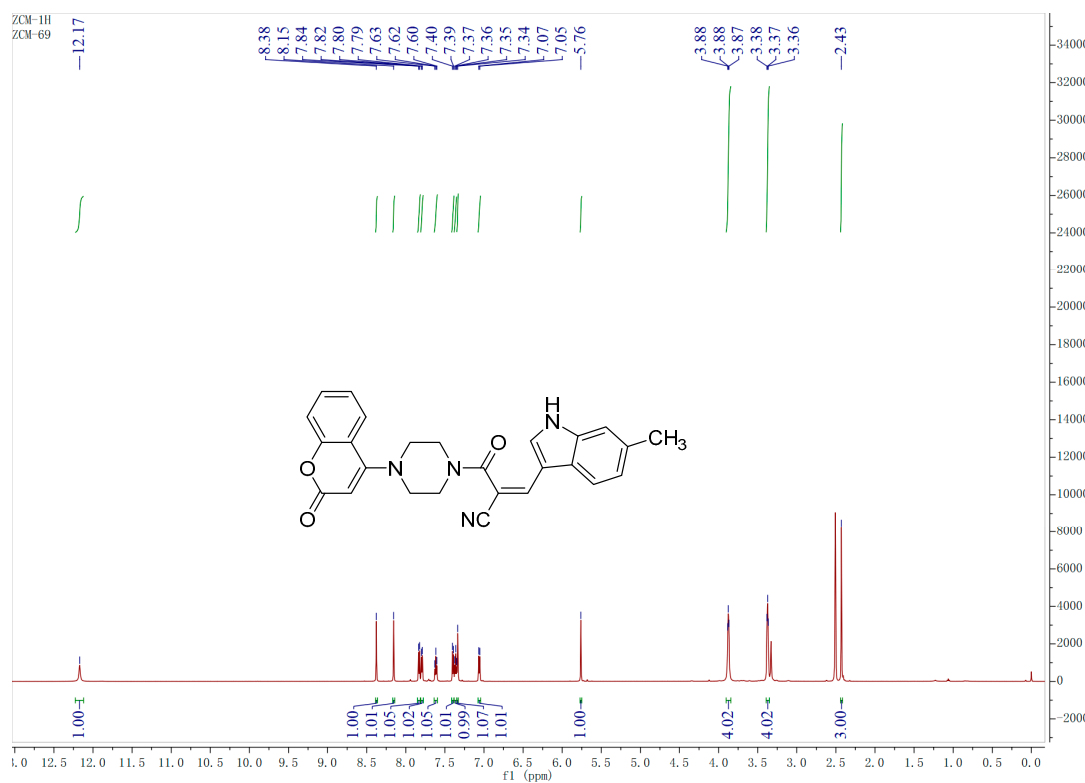

$^{13}C$  NMR spectrum (151 MHz, 25 °C, DMSO- $d_6$ )

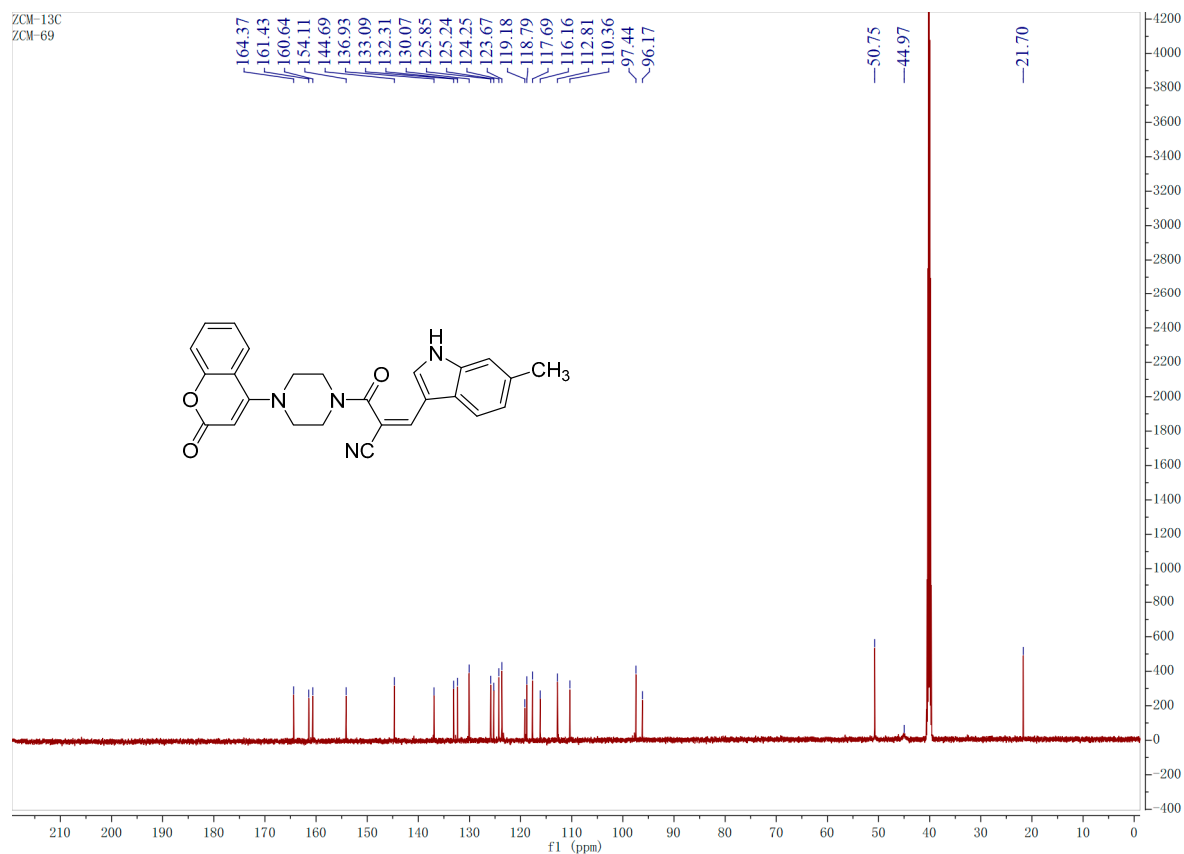

HRMS spectrum

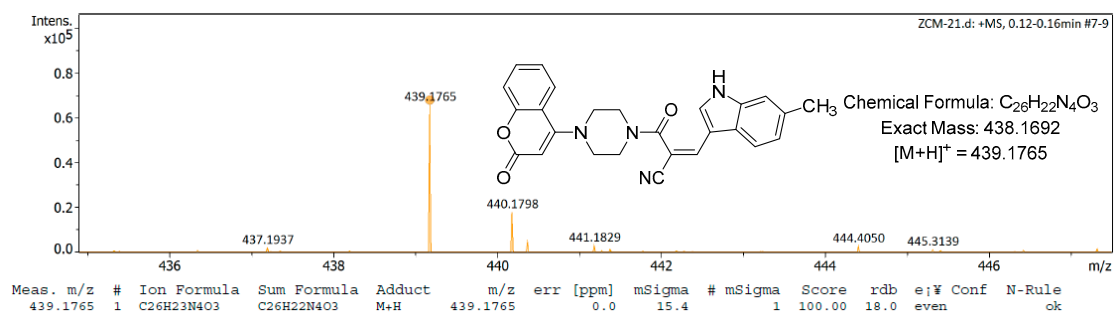

## 2.8. Spectra of compound **5g**

<sup>1</sup>H NMR spectrum (600 MHz, 25 °C, DMSO-*d*<sub>6</sub>)

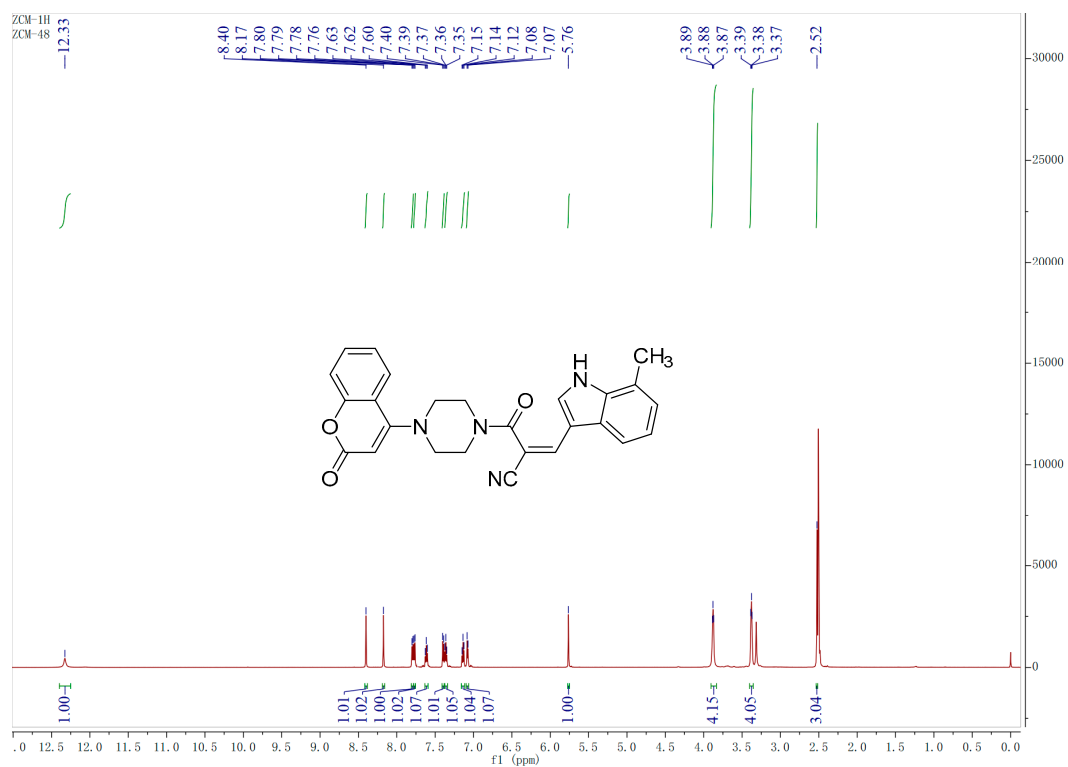

<sup>13</sup>C NMR spectrum (151 MHz, 25 °C, DMSO-*d*<sub>6</sub>)

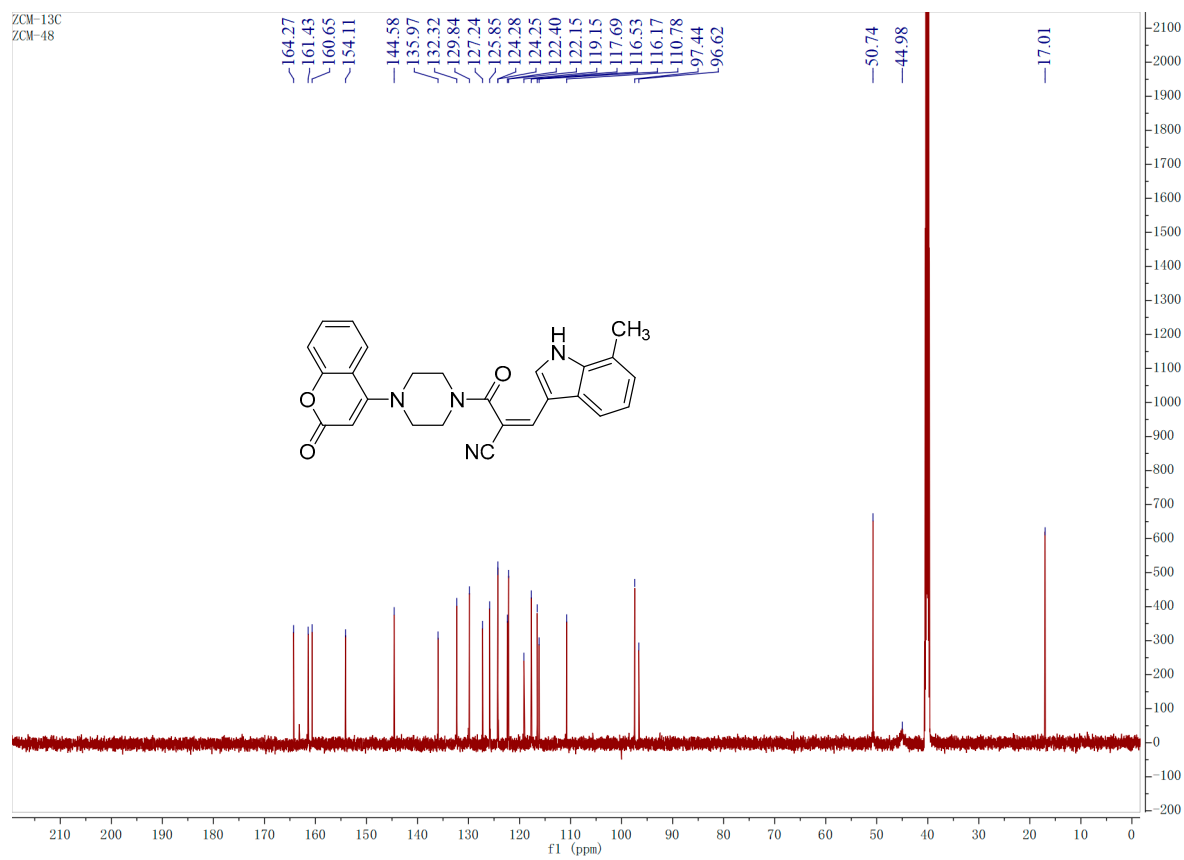

HRMS spectrum

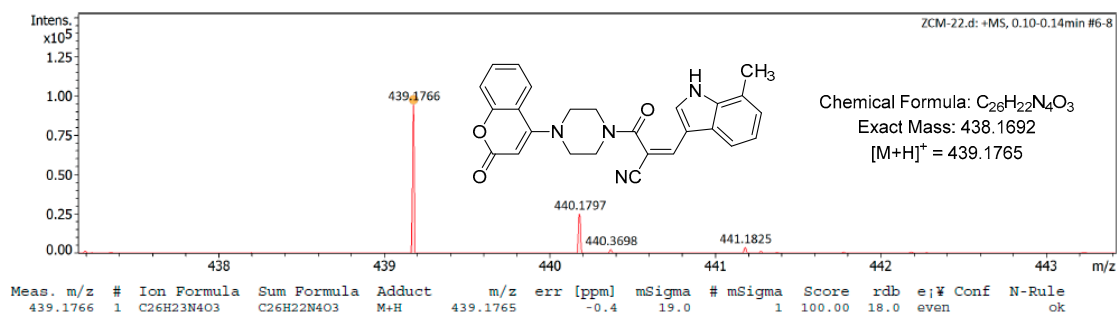

## 2.9. Spectra of compound **7a**

<sup>1</sup>H NMR spectrum (600 MHz, 25 °C, DMSO-*d*<sub>6</sub>)

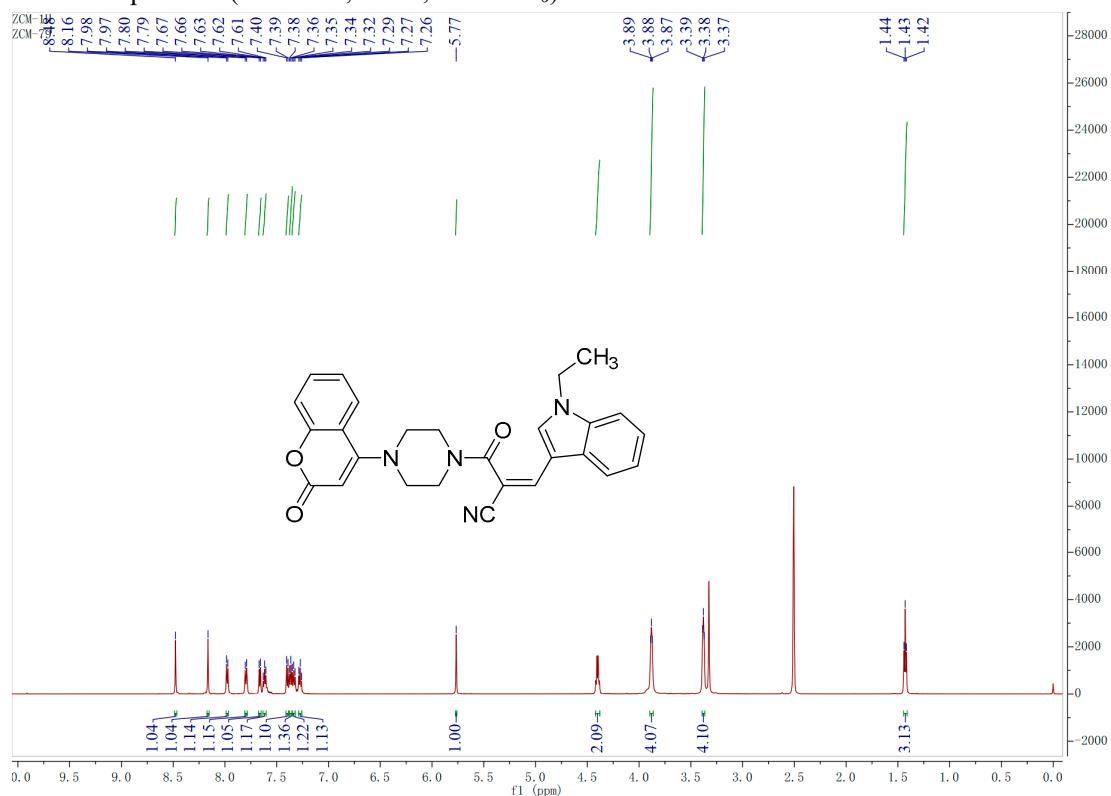

<sup>13</sup>C NMR spectrum (151 MHz, 25 °C, DMSO-*d*<sub>6</sub>)

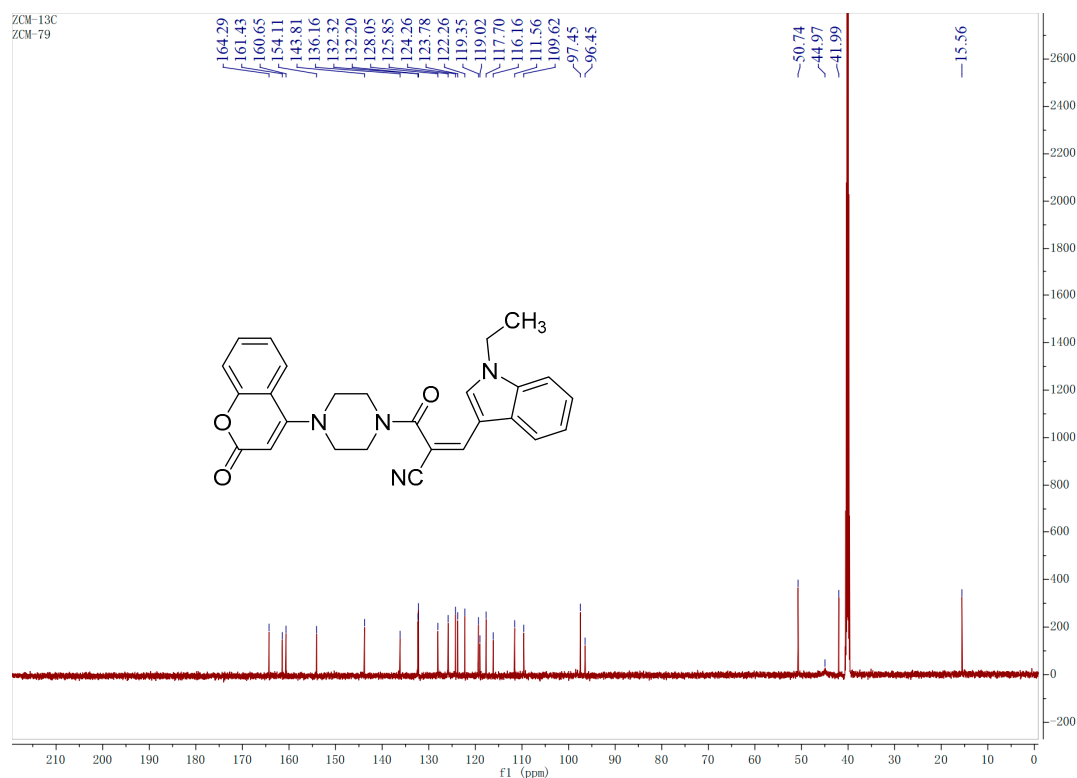

## HRMS spectrum

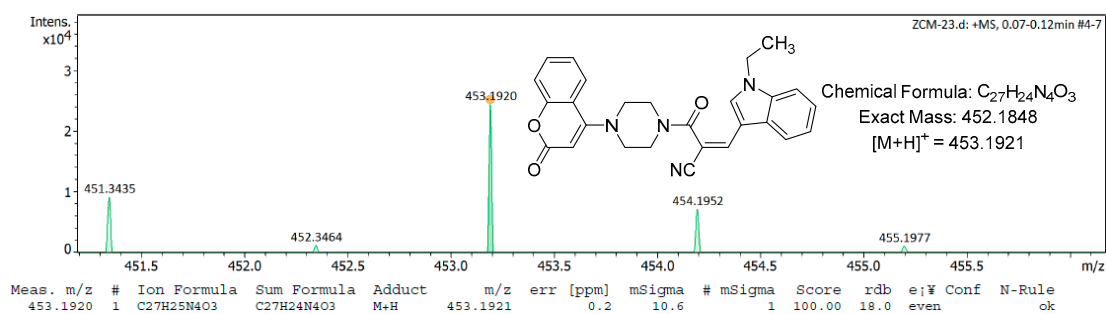

## 2.10. Spectra of compound 7b

<sup>1</sup>H NMR spectrum (600 MHz, 25 °C, DMSO-*d*<sub>6</sub>)

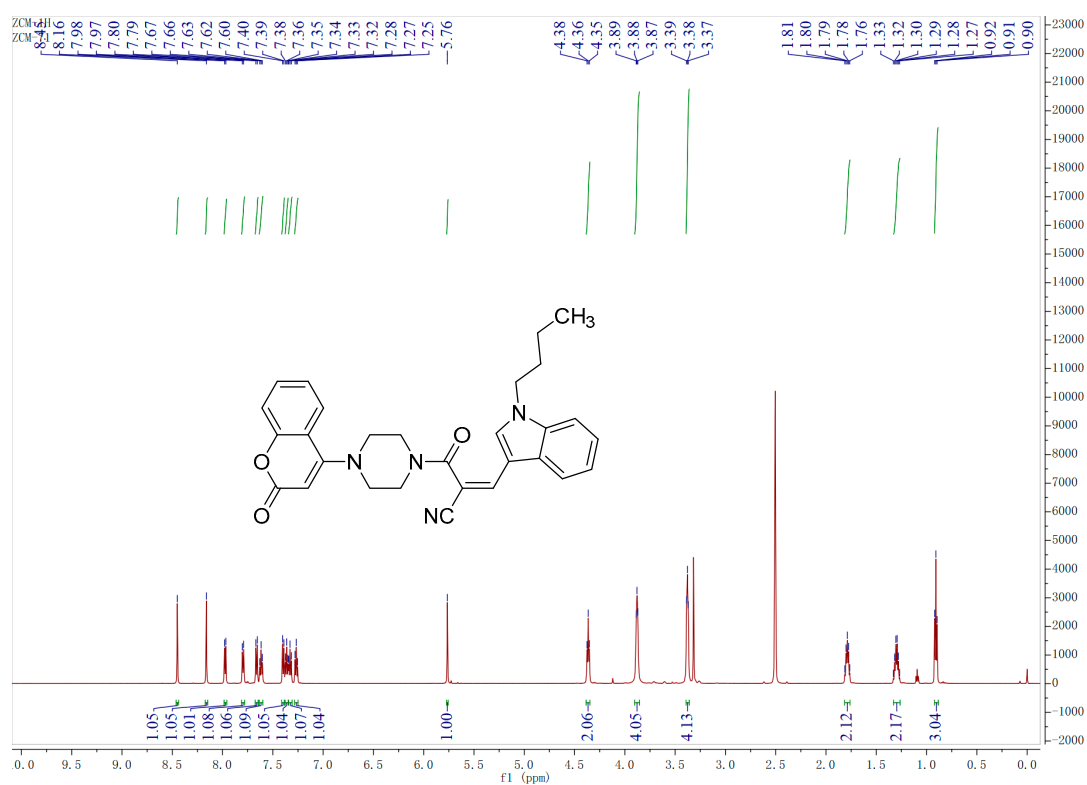

<sup>13</sup>C NMR spectrum (151 MHz, 25 °C, DMSO-*d*<sub>6</sub>)

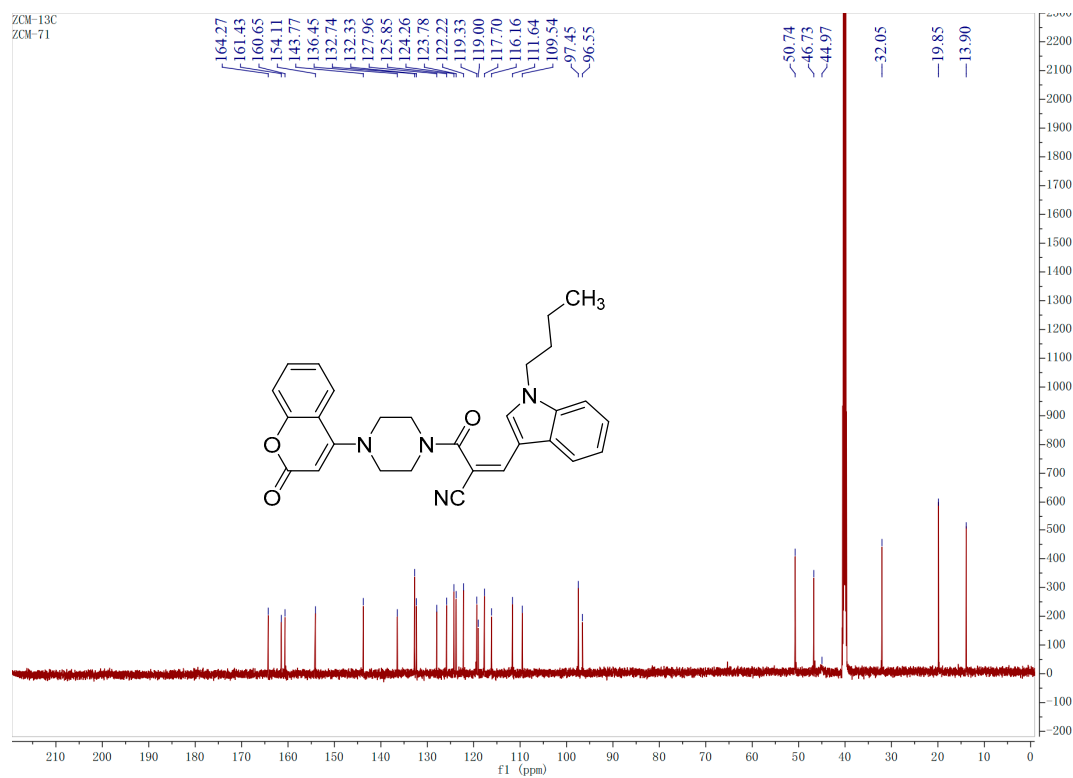

HRMS spectrum



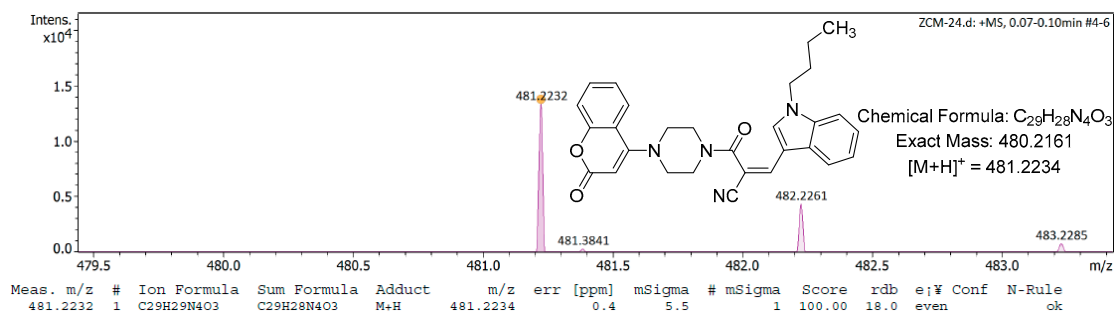

## 2.11. Spectra of compound 7c

<sup>1</sup>H NMR spectrum (600 MHz, 25 °C, DMSO-*d*<sub>6</sub>)

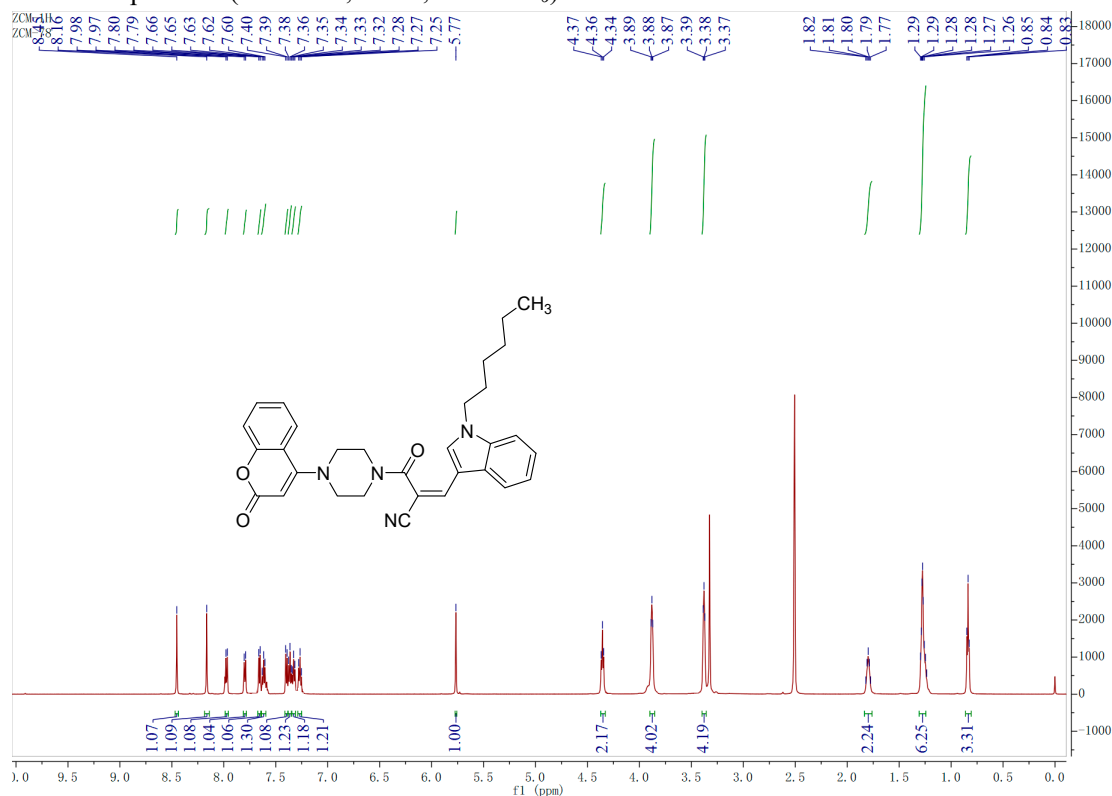

<sup>13</sup>C NMR spectrum (151 MHz, 25 °C, DMSO-*d*<sub>6</sub>)

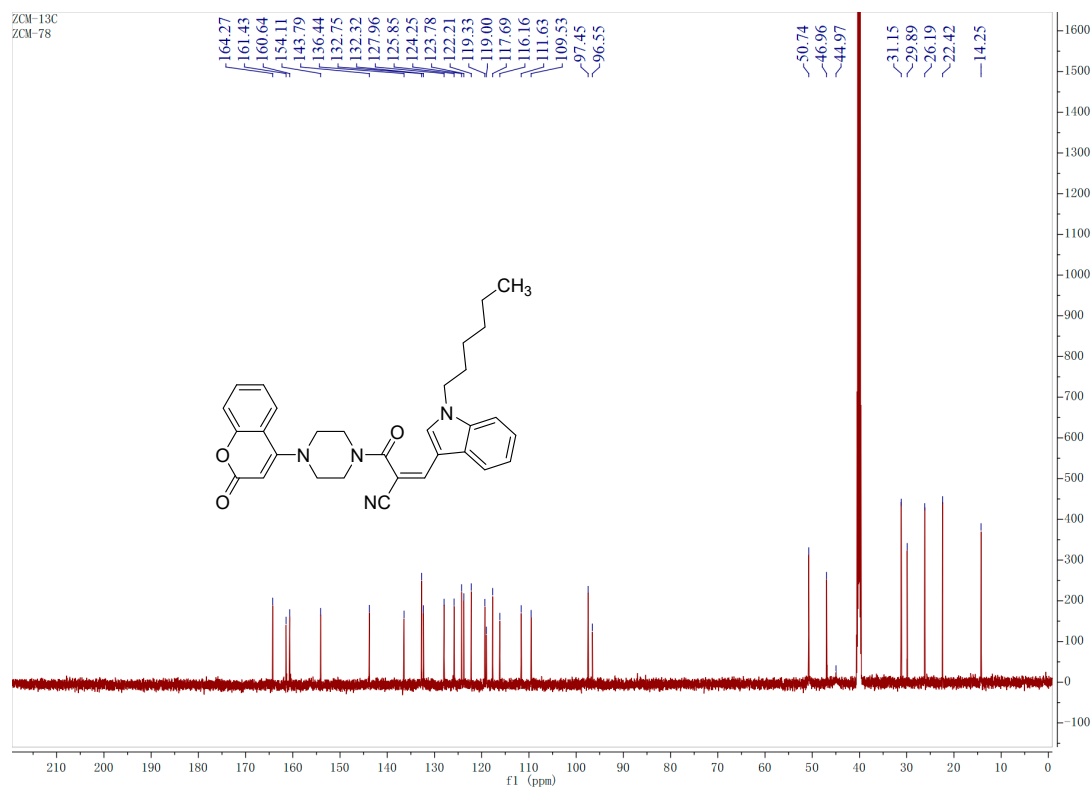

HRMS spectrum

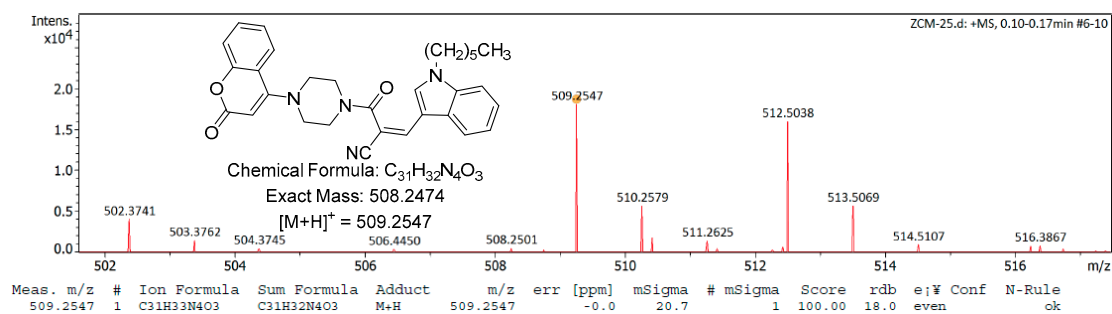

## 2.12. Spectra of compound 7d

$^1H$  NMR spectrum (600 MHz, 25 °C, DMSO- $d_6$ )

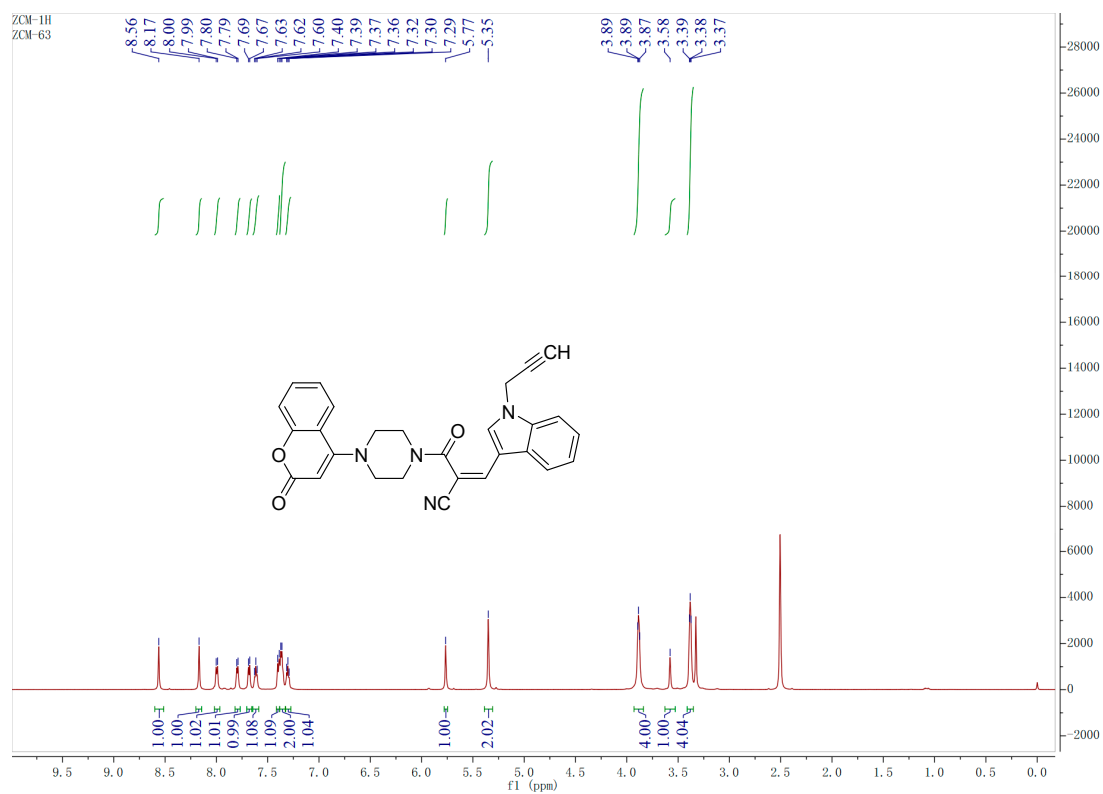

<sup>13</sup>C NMR spectrum (151 MHz, 25 °C, DMSO-*d*<sub>6</sub>)

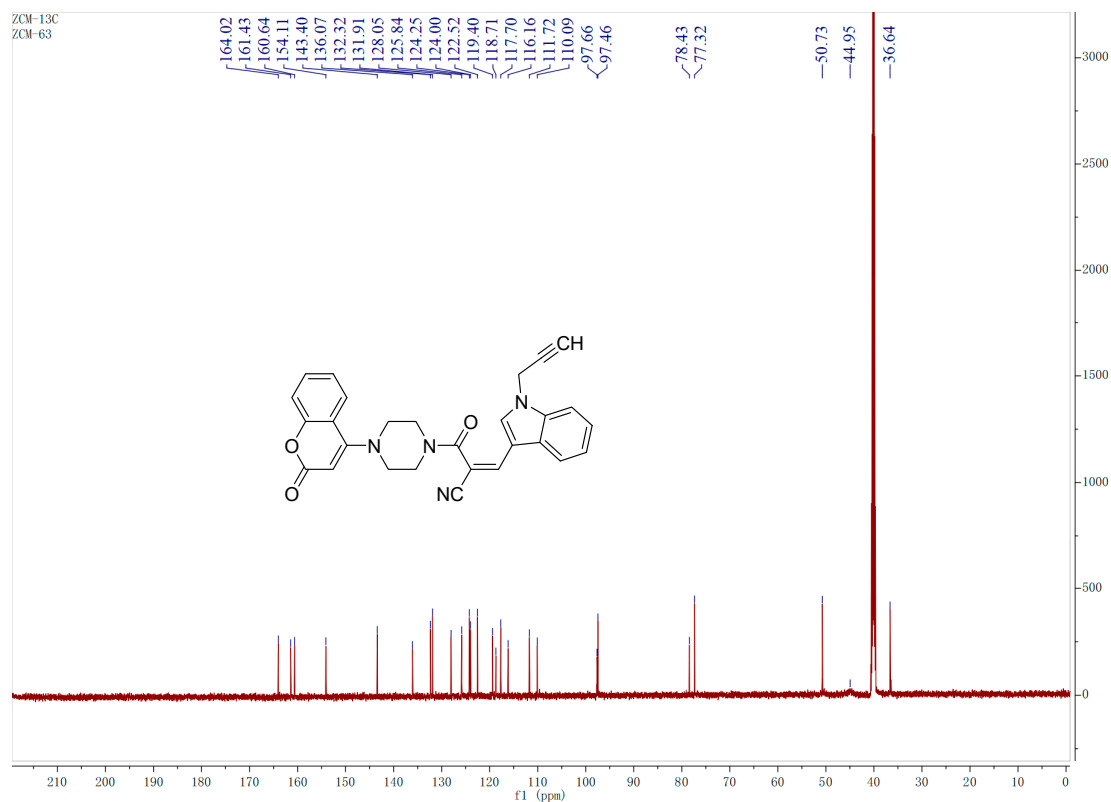

HRMS spectrum

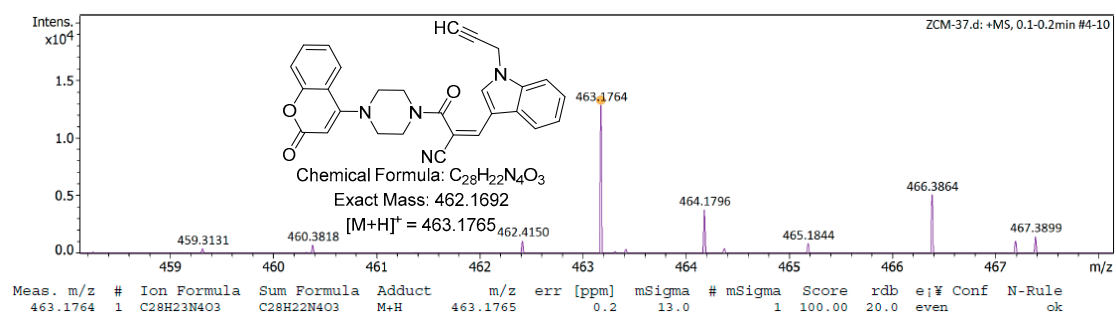

## 2.13. Spectra of compound 7e

$^1H$  NMR spectrum (600 MHz, 25 °C, DMSO- $d_6$ )

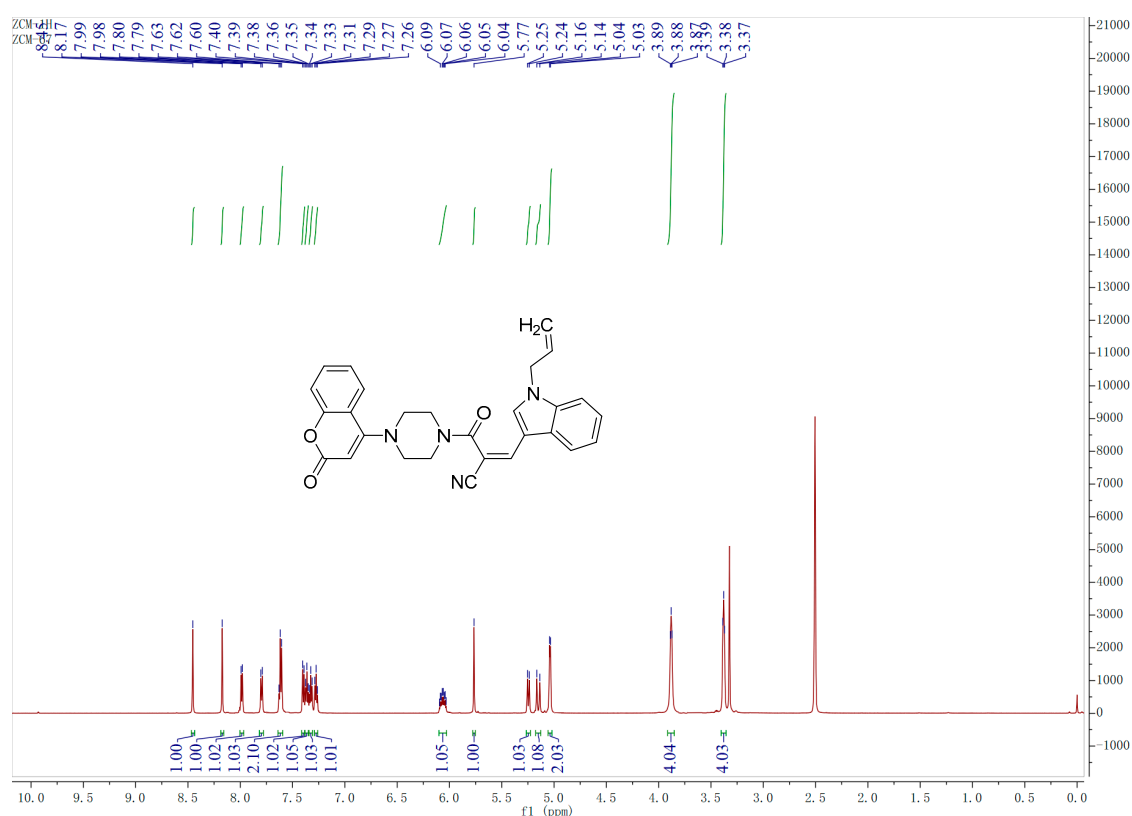

$^{13}C$  NMR spectrum (151 MHz, 25 °C, DMSO- $d_6$ )

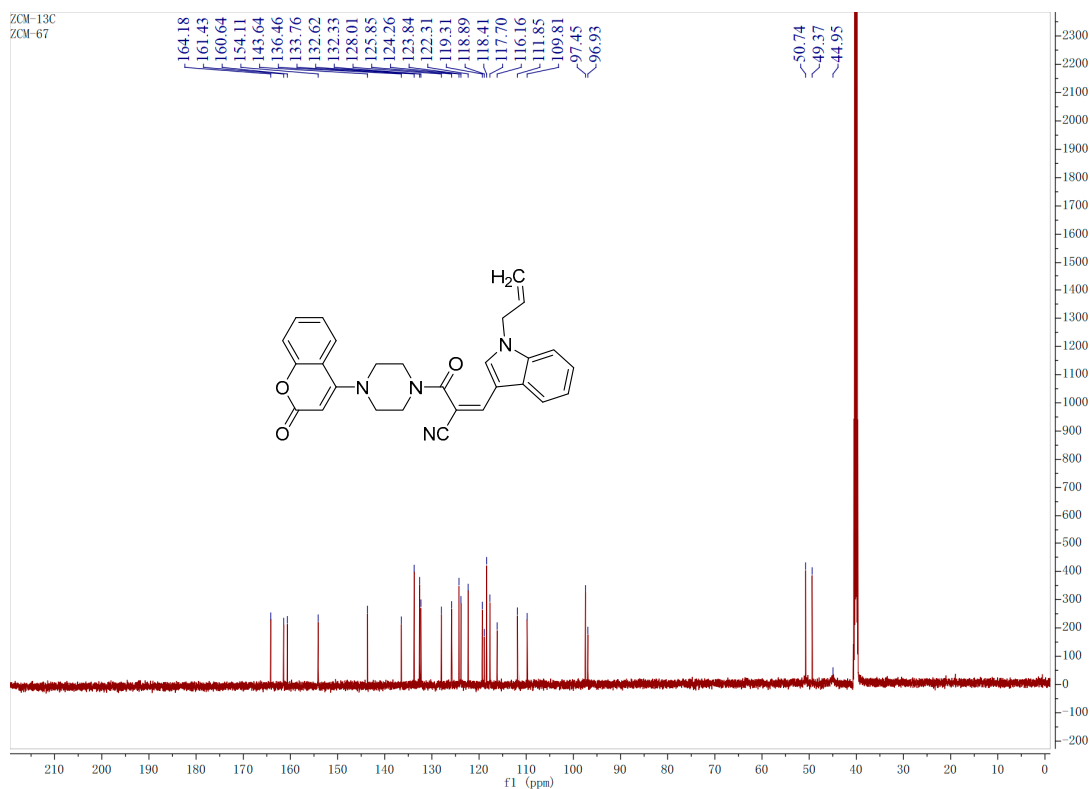

HRMS spectrum

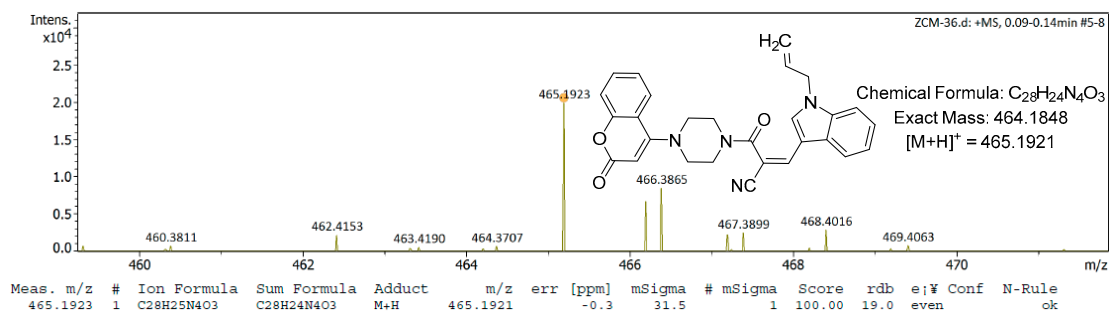

## 2.14. Spectra of compound 7f

<sup>1</sup>H NMR spectrum (600 MHz, 25 °C, DMSO-*d*<sub>6</sub>)

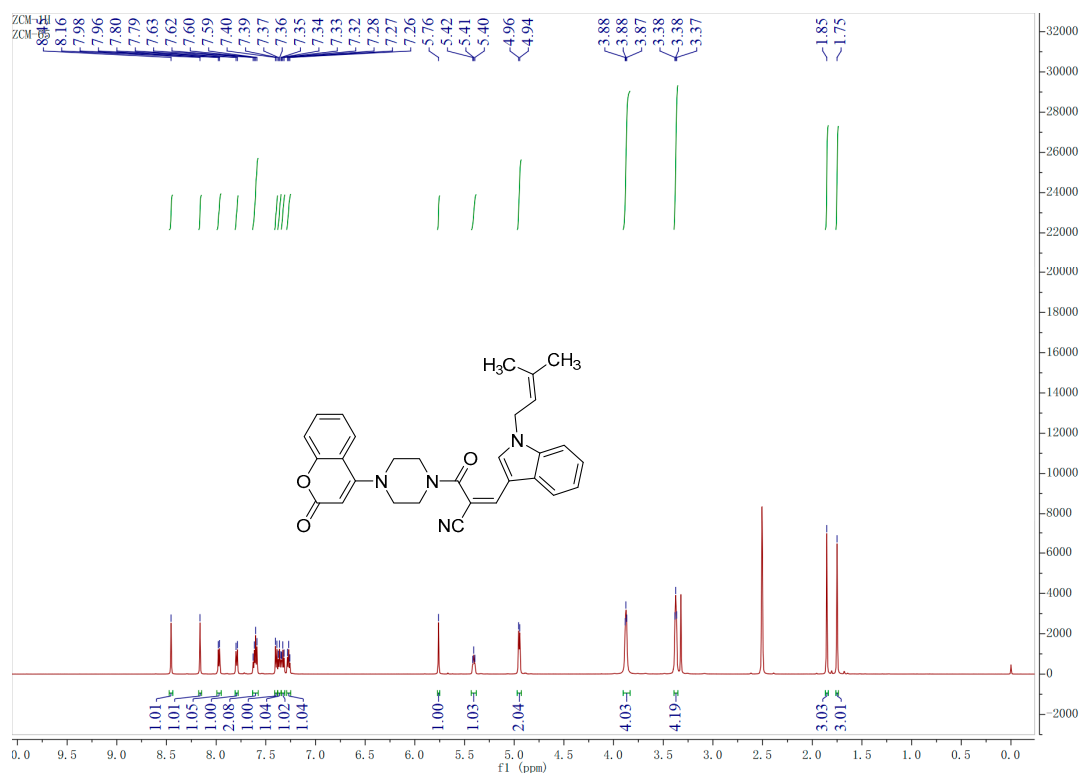

**<sup>13</sup>C NMR spectrum (151 MHz, 25 °C, DMSO-*d*<sub>6</sub>)**

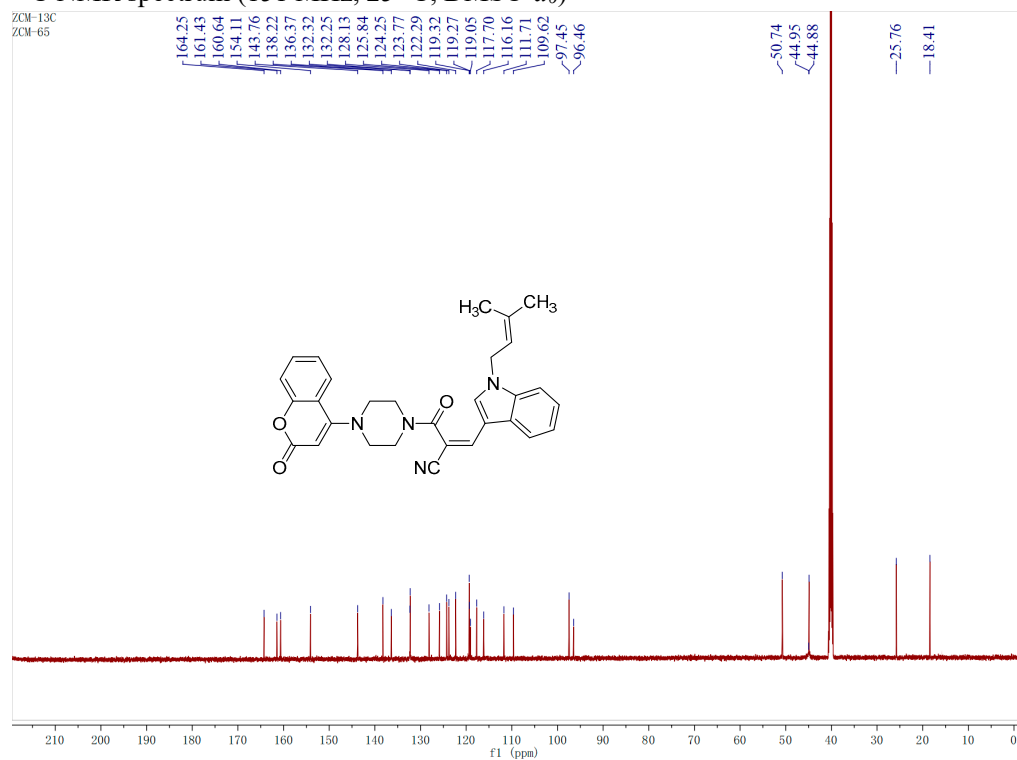

**HRMS spectrum**

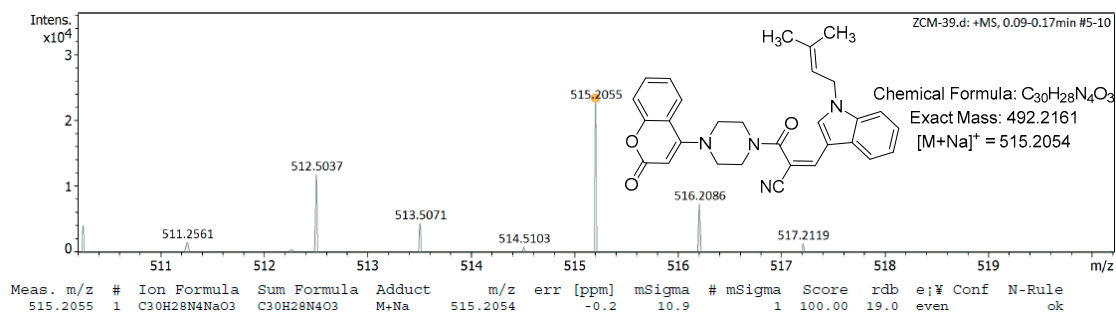

## 2.15. Spectra of compound 9a

<sup>1</sup>H NMR spectrum (600 MHz, 25 °C, DMSO-*d*<sub>6</sub>)

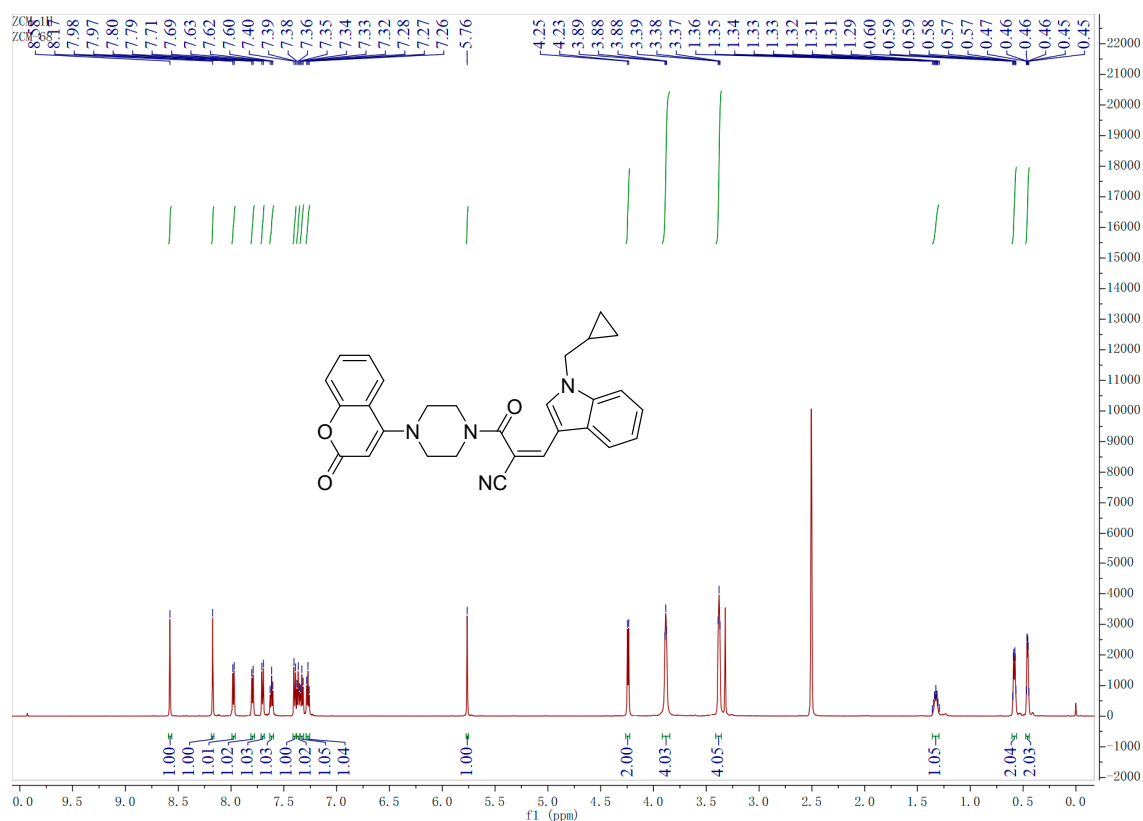

<sup>13</sup>C NMR spectrum (151 MHz, 25 °C, DMSO-*d*<sub>6</sub>)

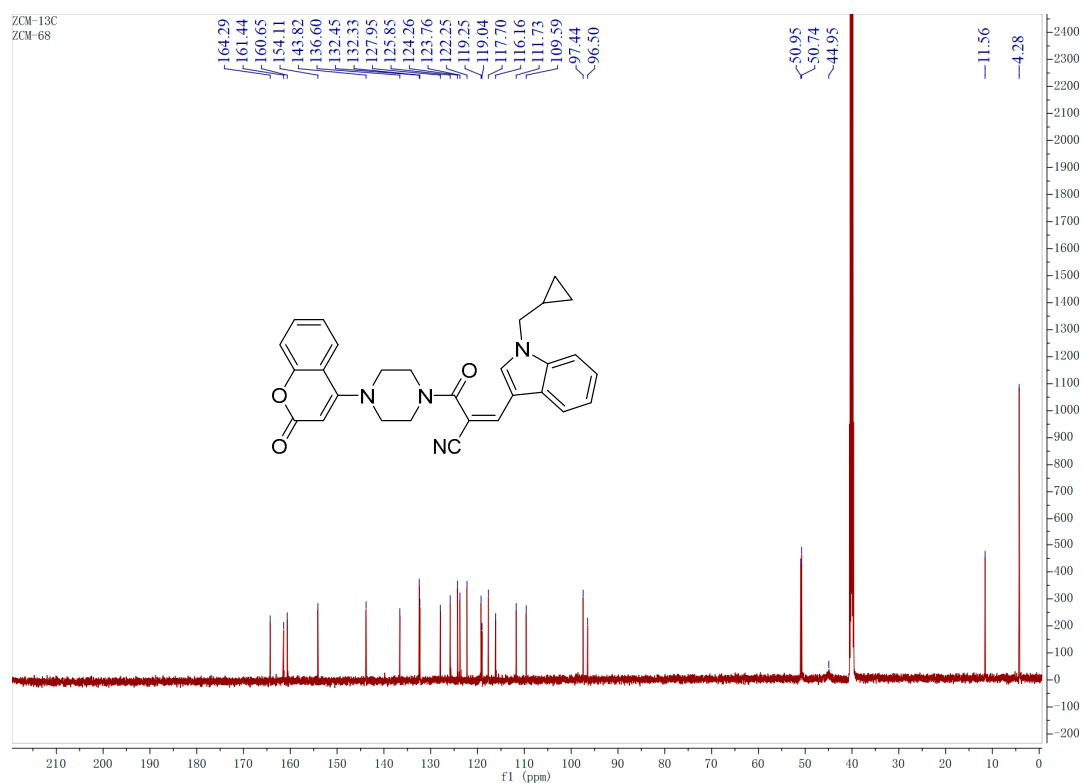

## HRMS spectrum

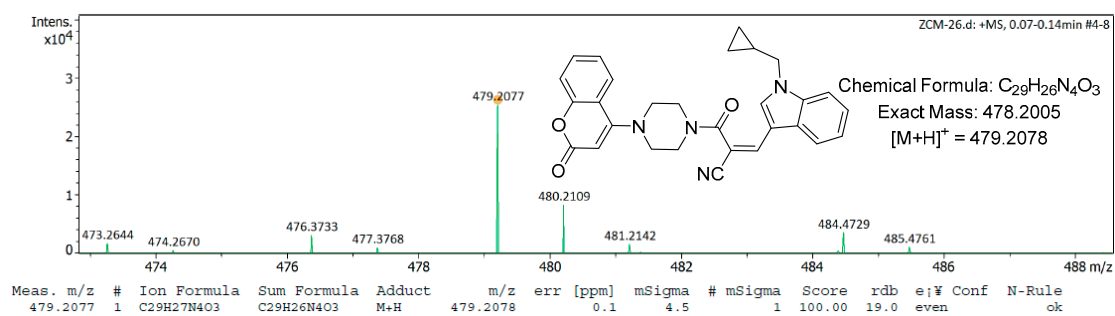

## 2.16. Spectra of compound 9b

<sup>1</sup>H NMR spectrum (600 MHz, 25 °C, DMSO-*d*<sub>6</sub>)





S27

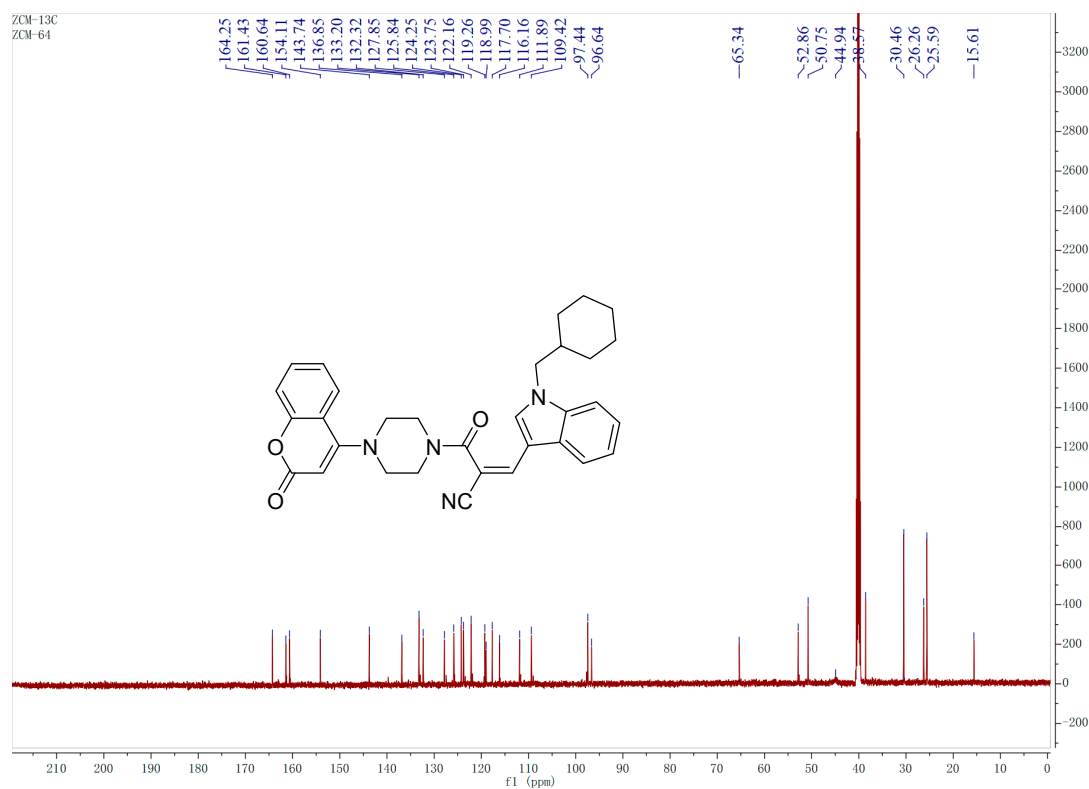

## HRMS spectrum

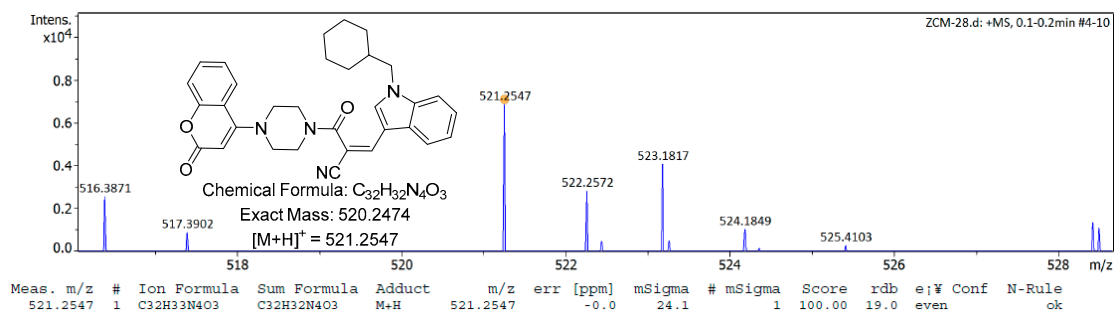

## 2.18. Spectra of compound 11a

<sup>1</sup>H NMR spectrum (600 MHz, 25 °C, DMSO-*d*<sub>6</sub>)

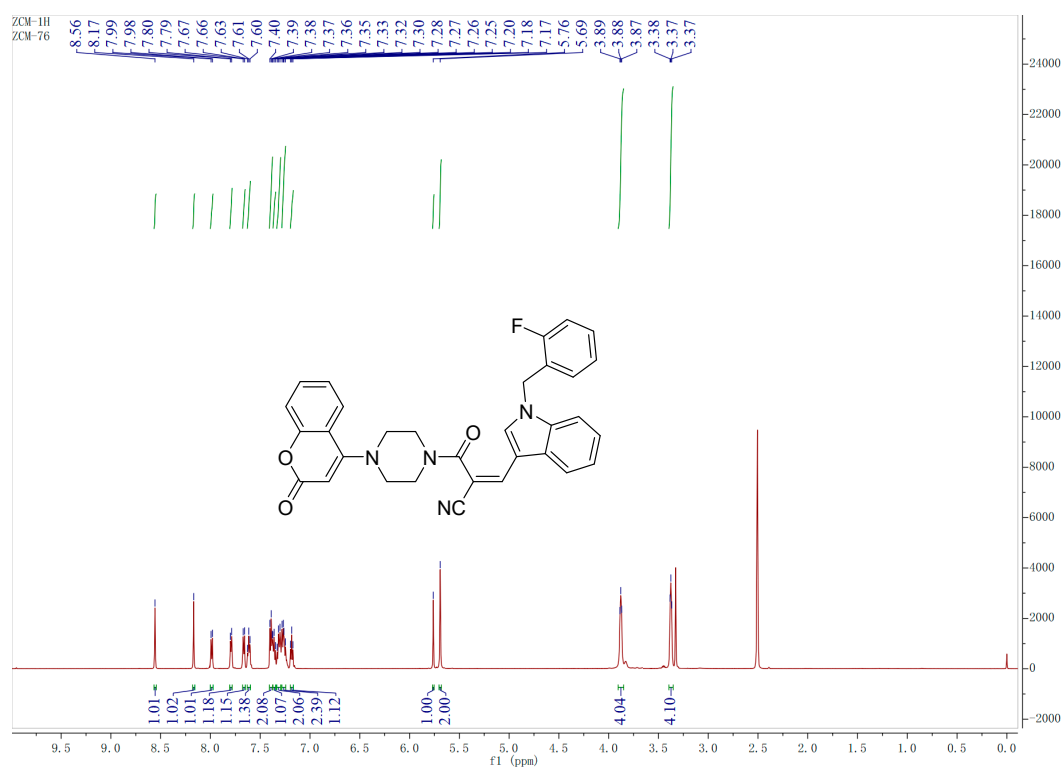

<sup>13</sup>C NMR spectrum (151 MHz, 25 °C, DMSO-*d*<sub>6</sub>)

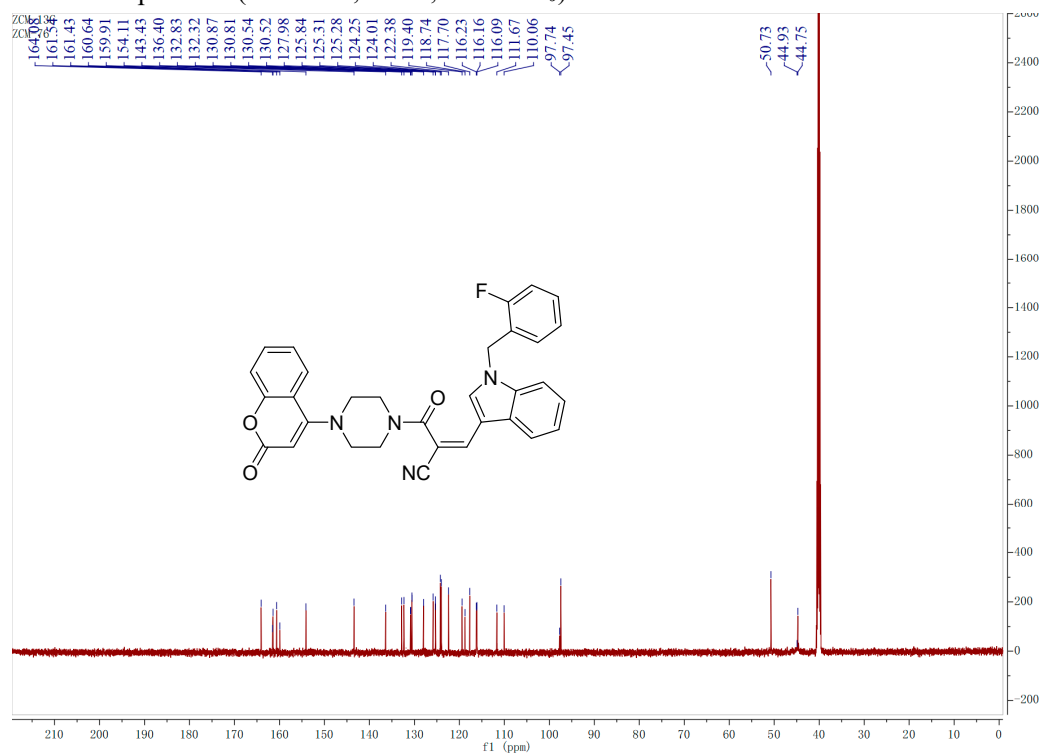

HRMS spectrum

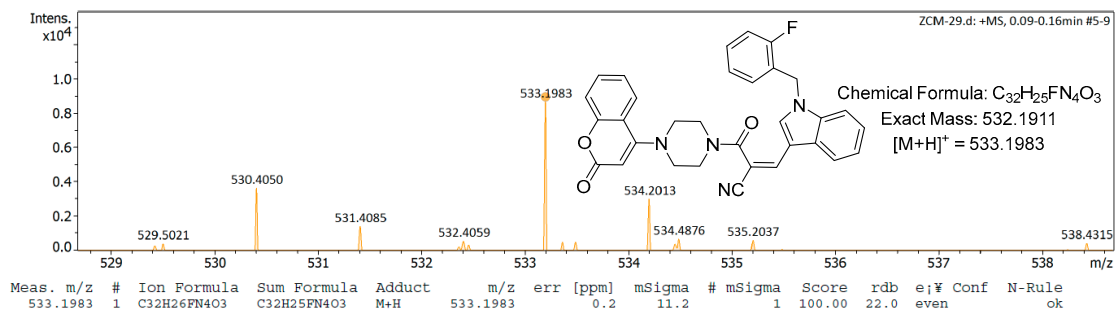

## 2.19. Spectra of compound 11b

<sup>1</sup>H NMR spectrum (600 MHz, 25 °C, DMSO-d<sub>6</sub>)

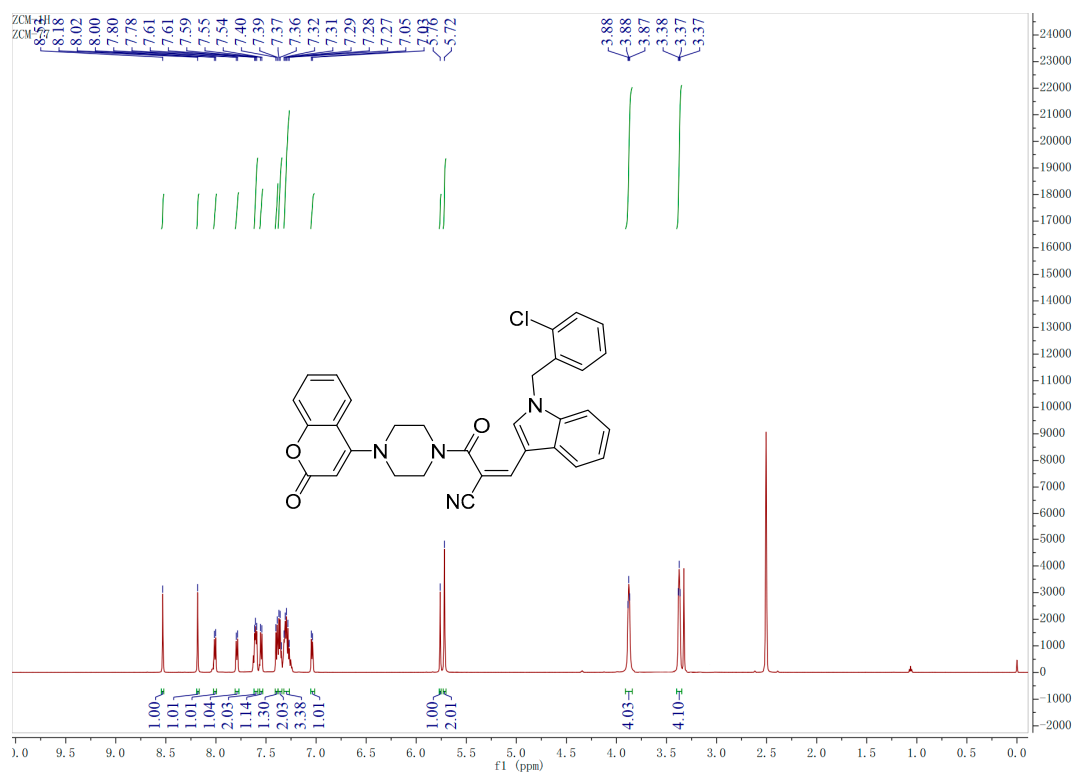

<sup>13</sup>C NMR spectrum (151 MHz, 25 °C, DMSO-d<sub>6</sub>)

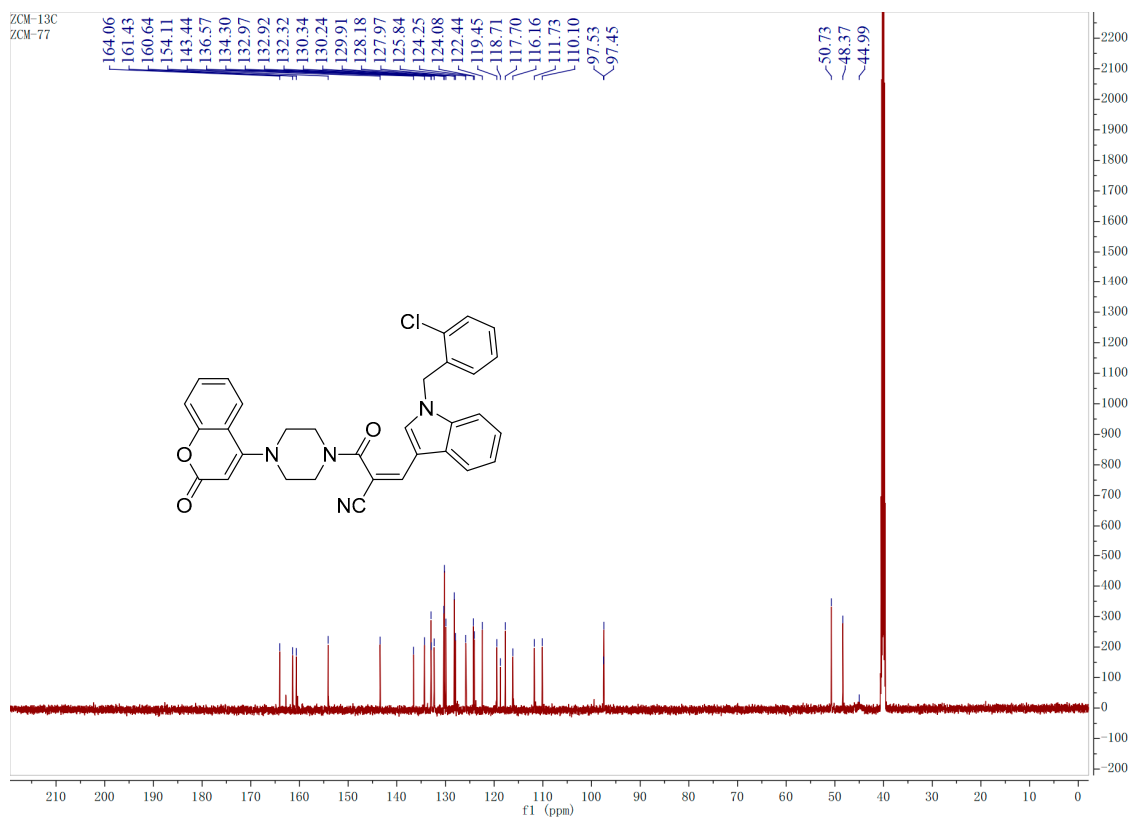

## HRMS spectrum

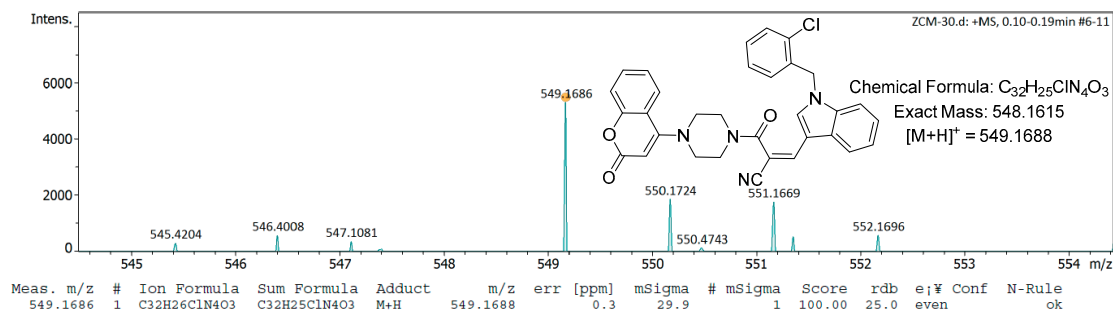

## 2.20. Spectra of compound 11c

<sup>1</sup>H NMR spectrum (600 MHz, 25 °C, DMSO-*d*<sub>6</sub>)

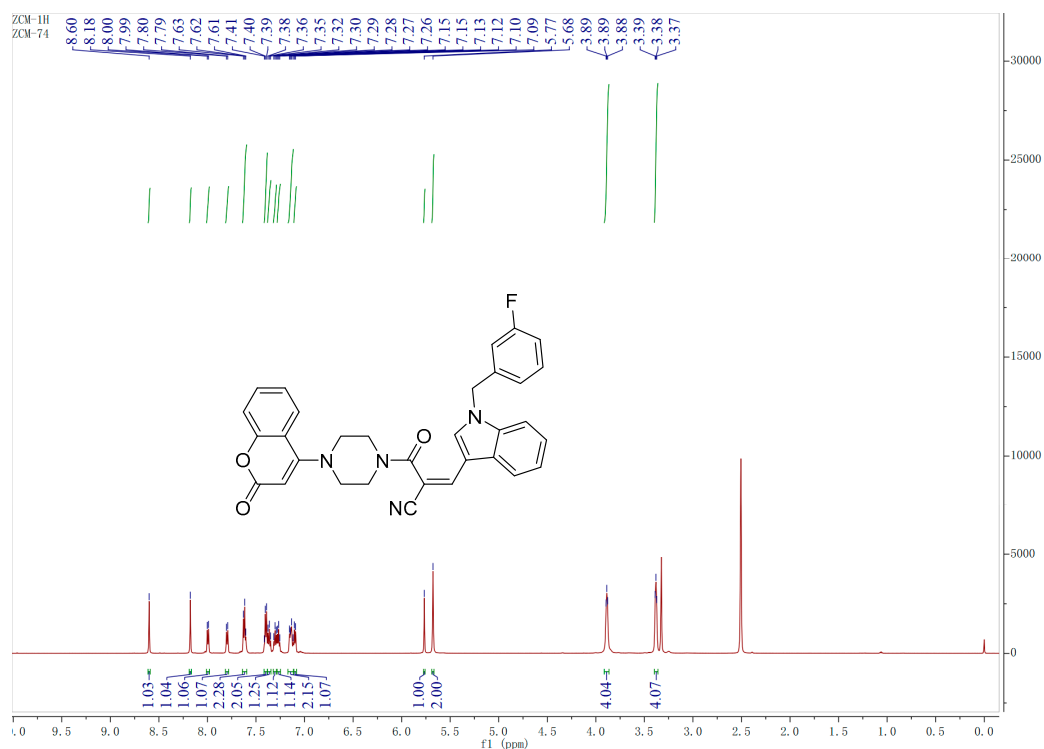

<sup>13</sup>C NMR spectrum (151 MHz, 25 °C, DMSO-*d*<sub>6</sub>)

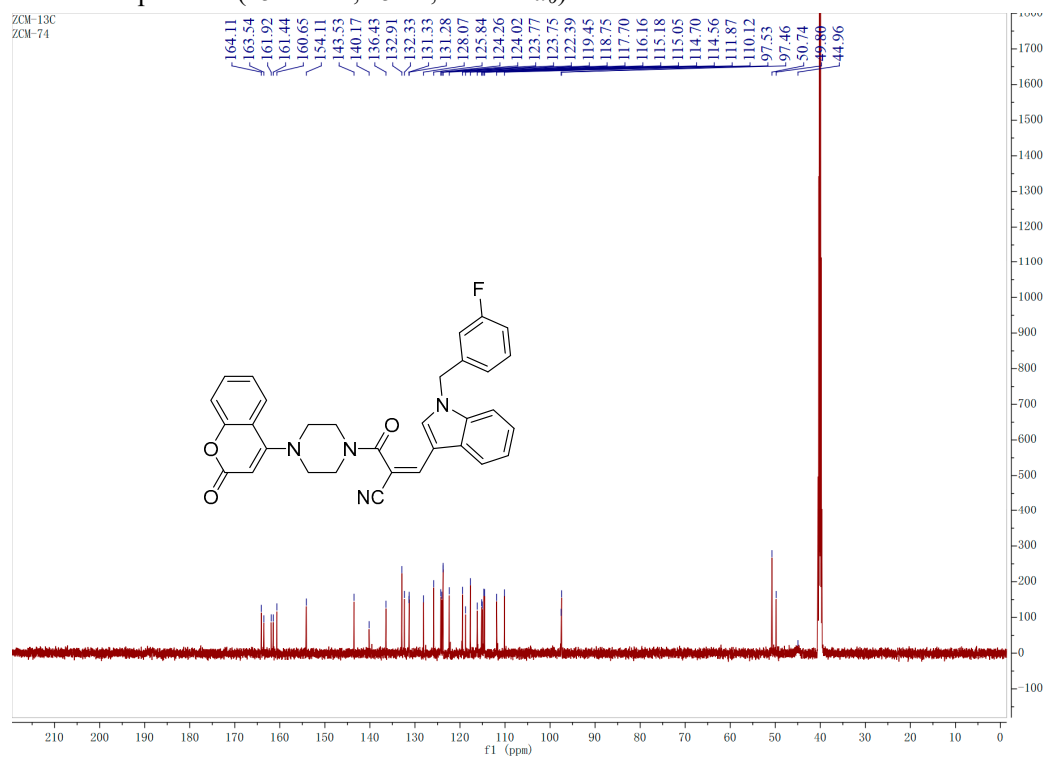

HRMS spectrum

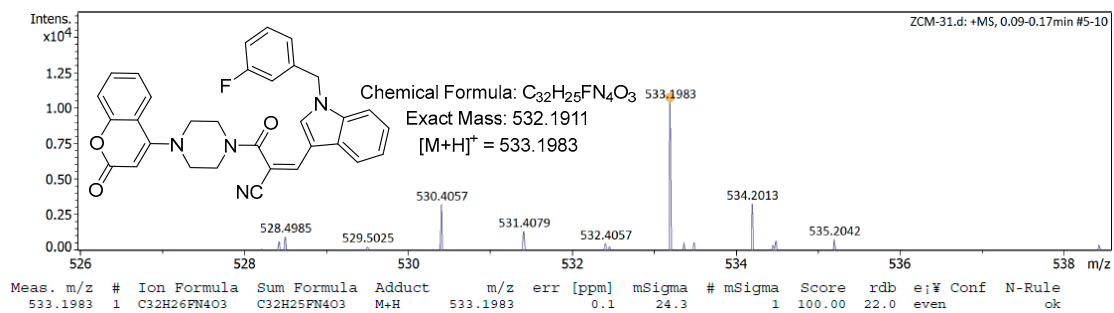

## 2.21. Spectra of compound **11d**

$^1H$  NMR spectrum (600 MHz, 25 °C, DMSO- $d_6$ )

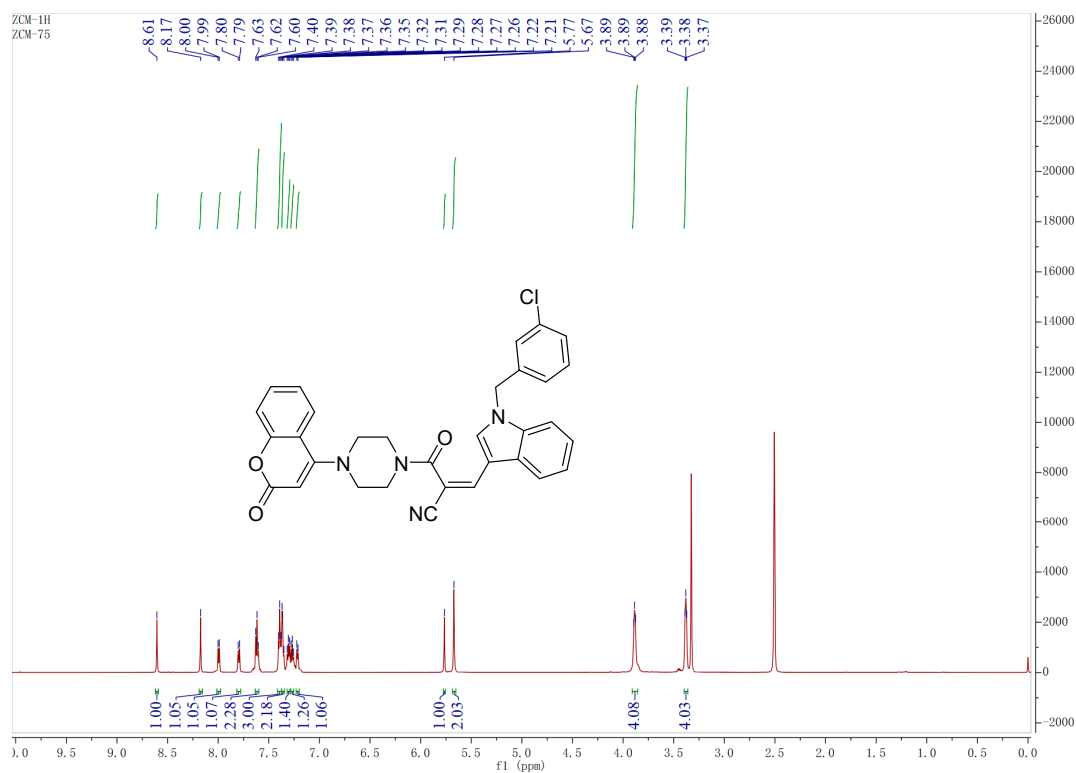

$^{13}C$  NMR spectrum (151 MHz, 25 °C, DMSO- $d_6$ )



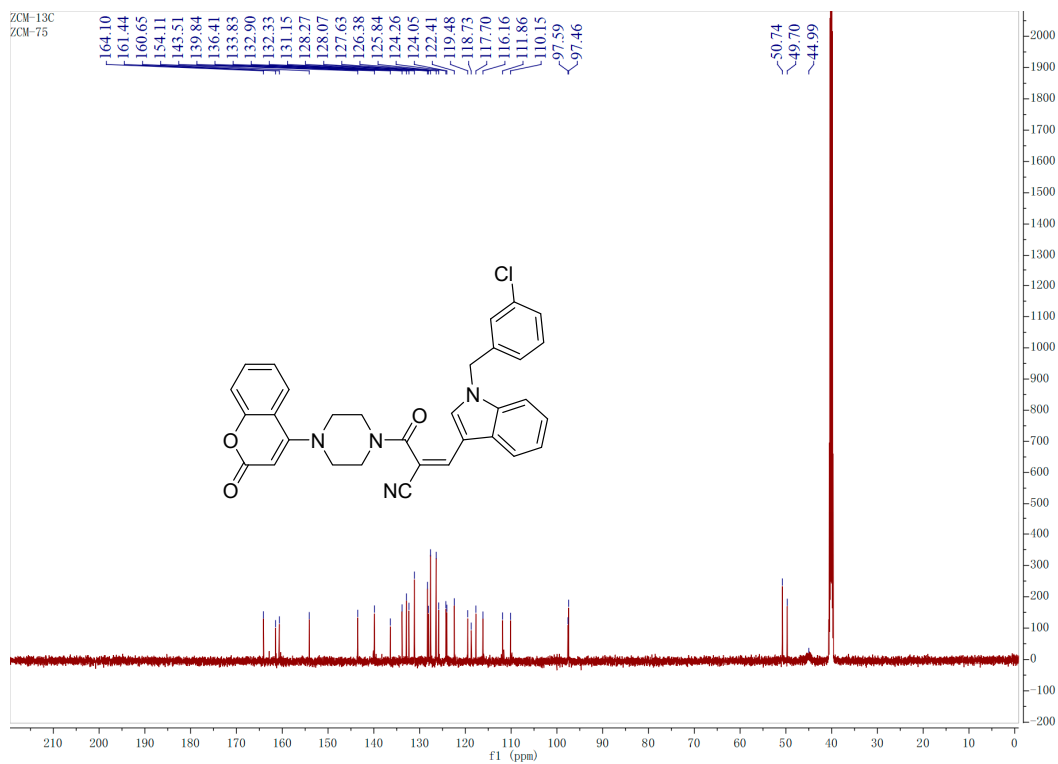

## HRMS spectrum

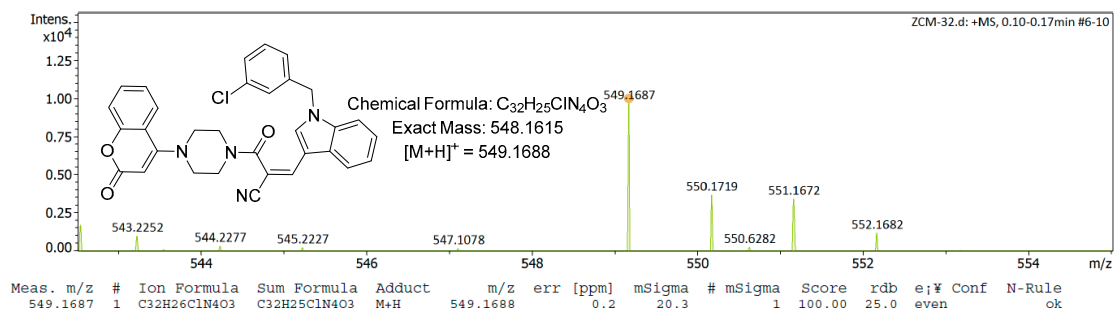

## 2.22. Spectra of compound 11e

<sup>1</sup>H NMR spectrum (600 MHz, 25 °C, DMSO-*d*<sub>6</sub>)

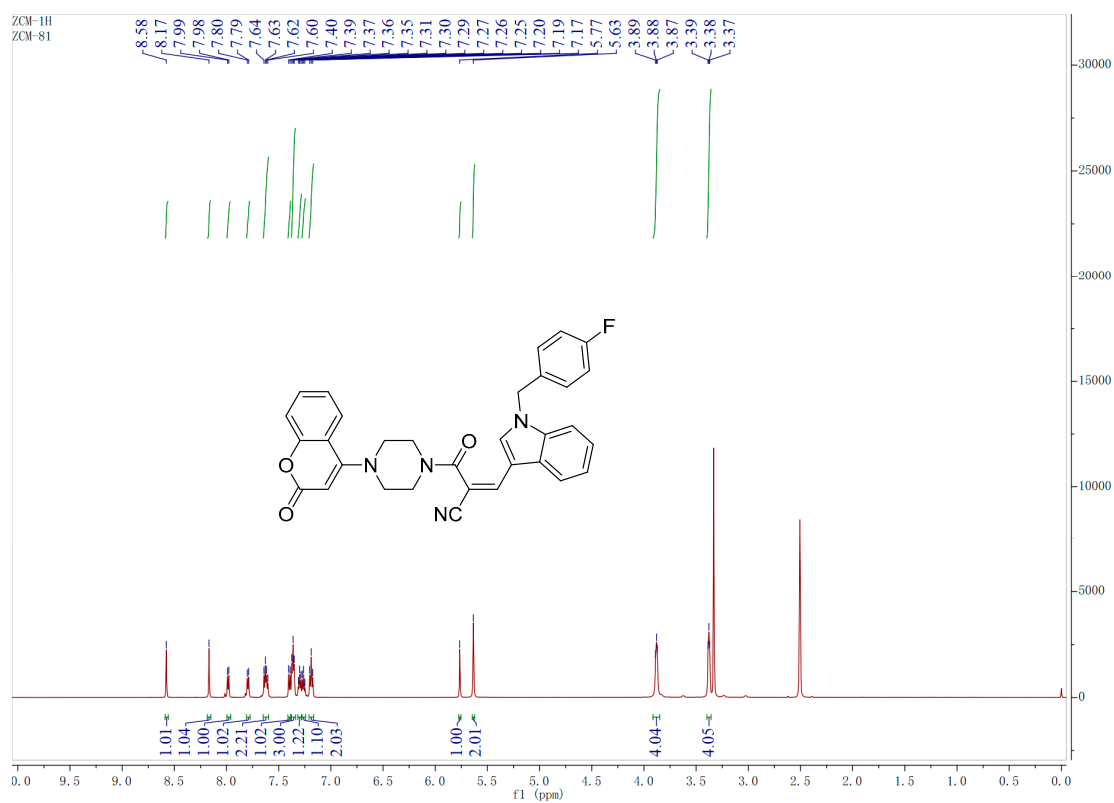

<sup>13</sup>C NMR spectrum (151 MHz, 25 °C, DMSO-*d*<sub>6</sub>)

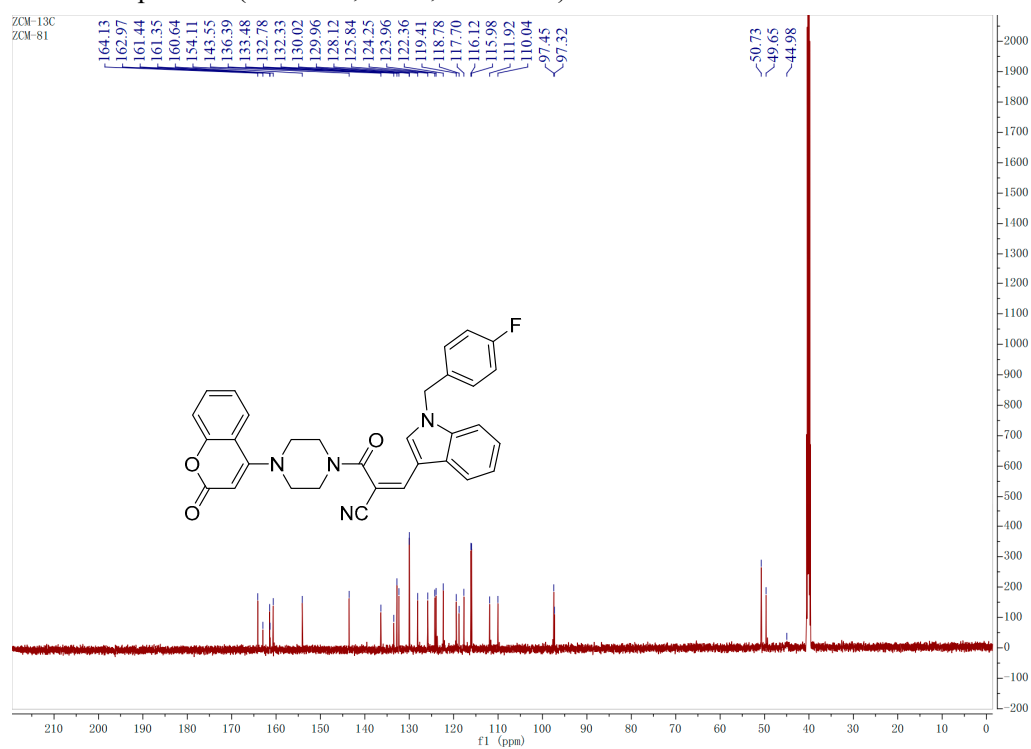

HRMS spectrum

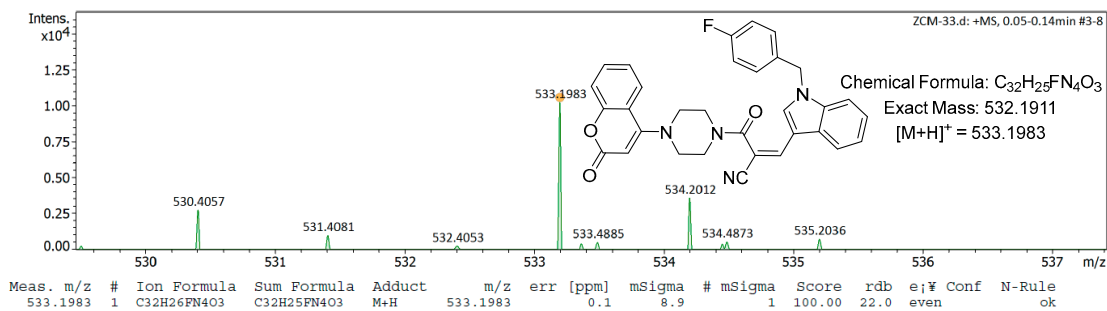

## 2.23. Spectra of compound **11f**

$^1H$  NMR spectrum (600 MHz, 25 °C, DMSO- $d_6$ )

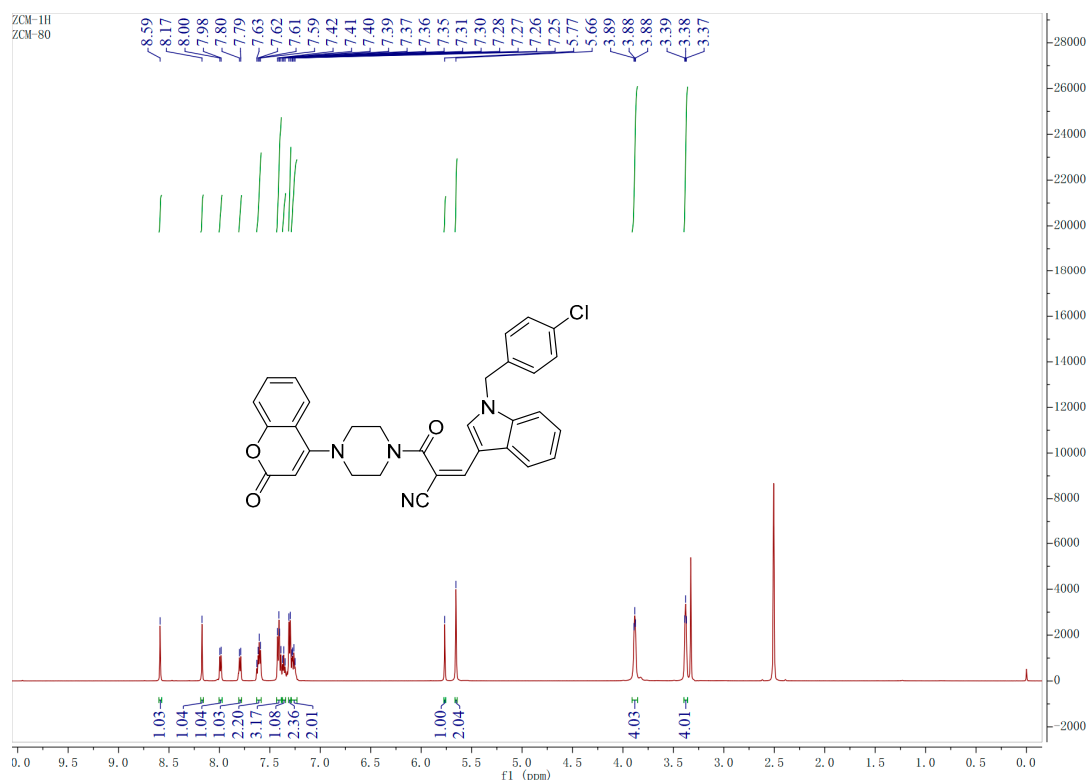

$^{13}C$  NMR spectrum (151 MHz, 25 °C, DMSO- $d_6$ )

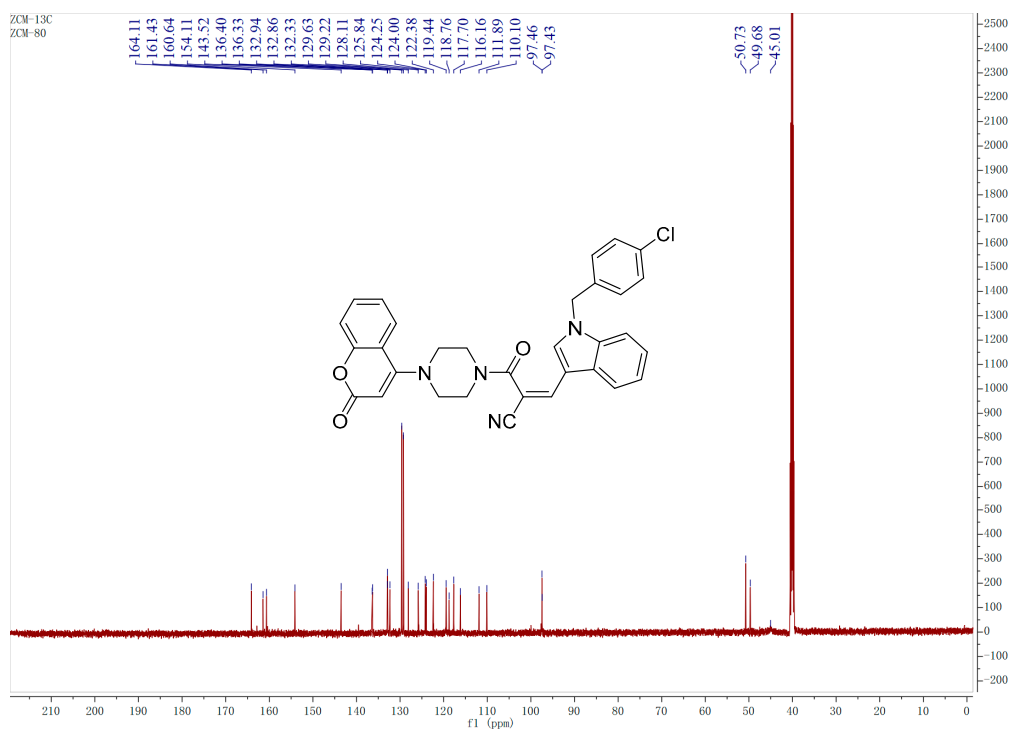

H-H COSY spectrum

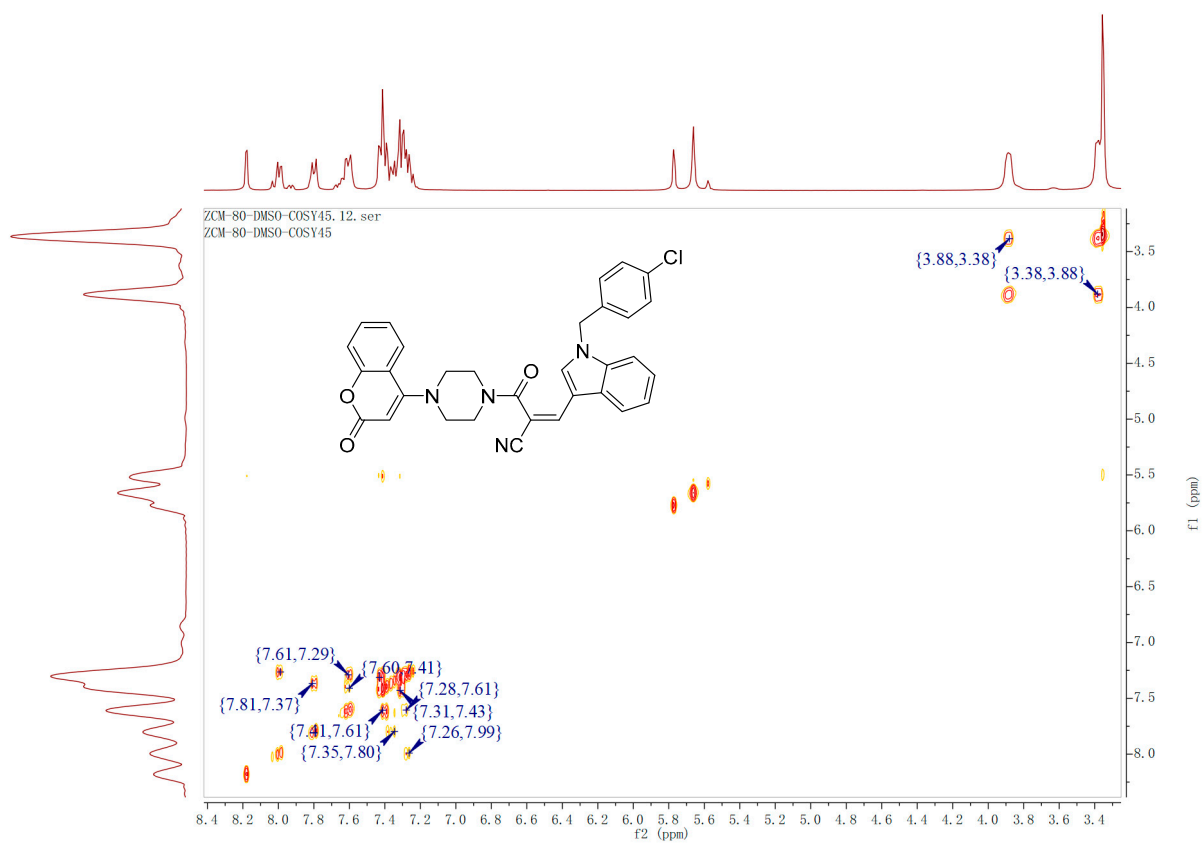

HMQC spectrum

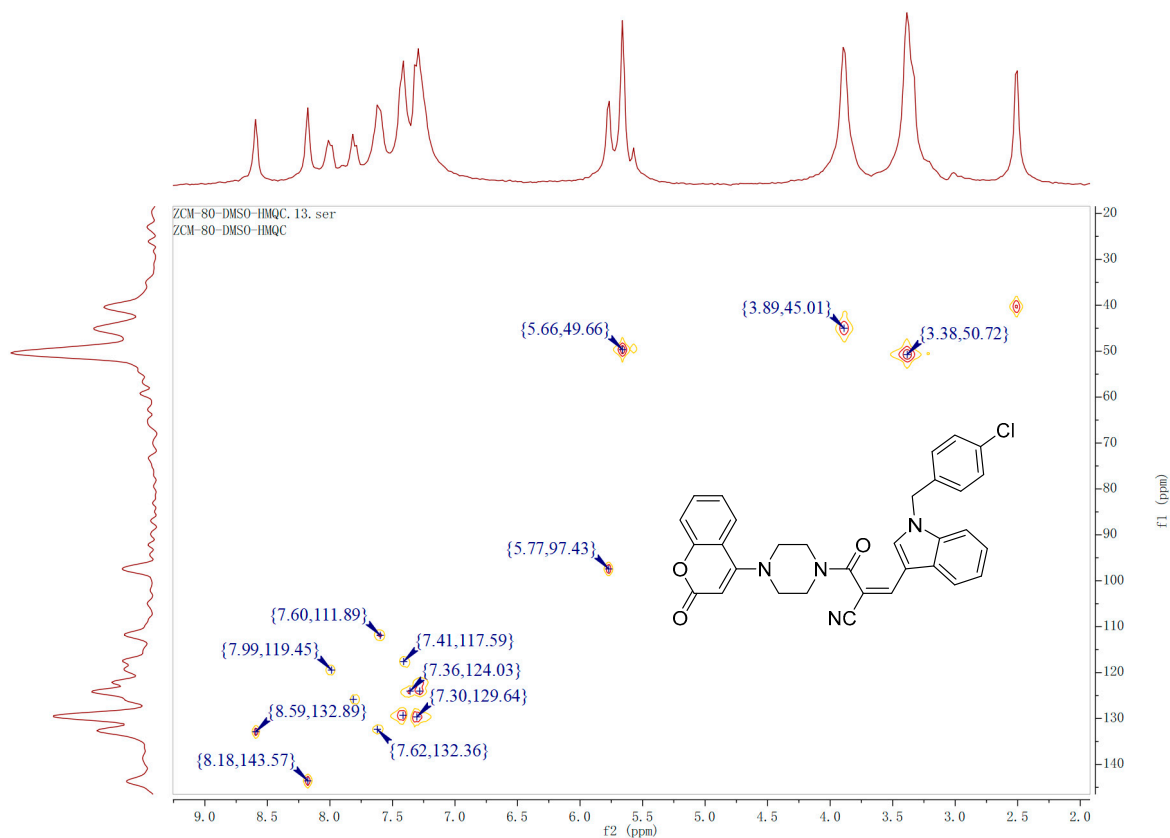

HMBC spectrum

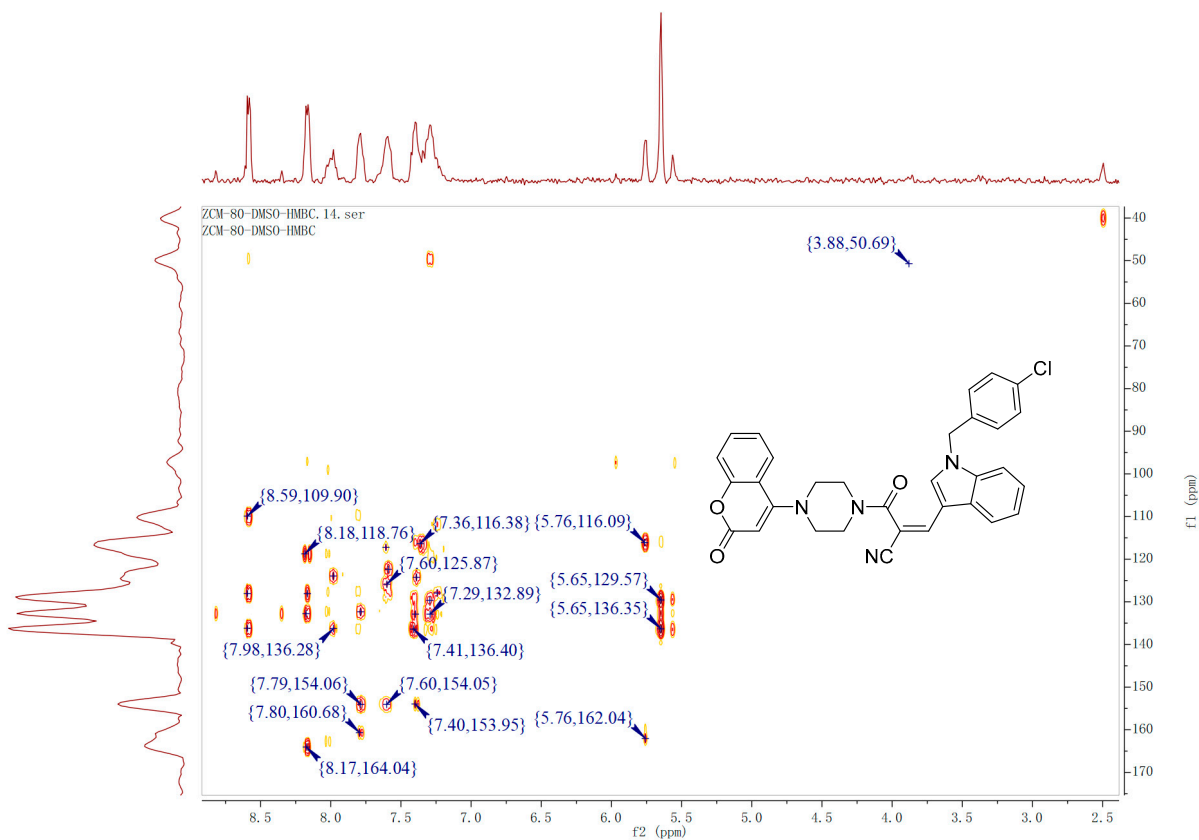

HRMS spectrum

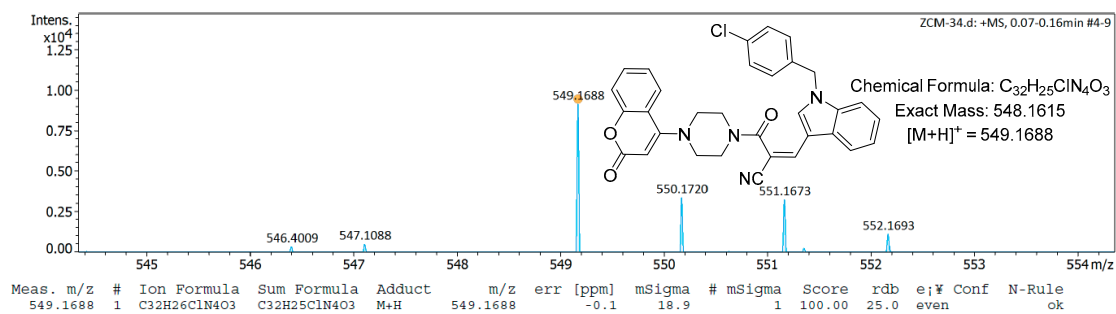

## 2.24. Spectra of compound **11g**

<sup>1</sup>H NMR spectrum (400 MHz, 25 °C, DMSO-*d*<sub>6</sub>)

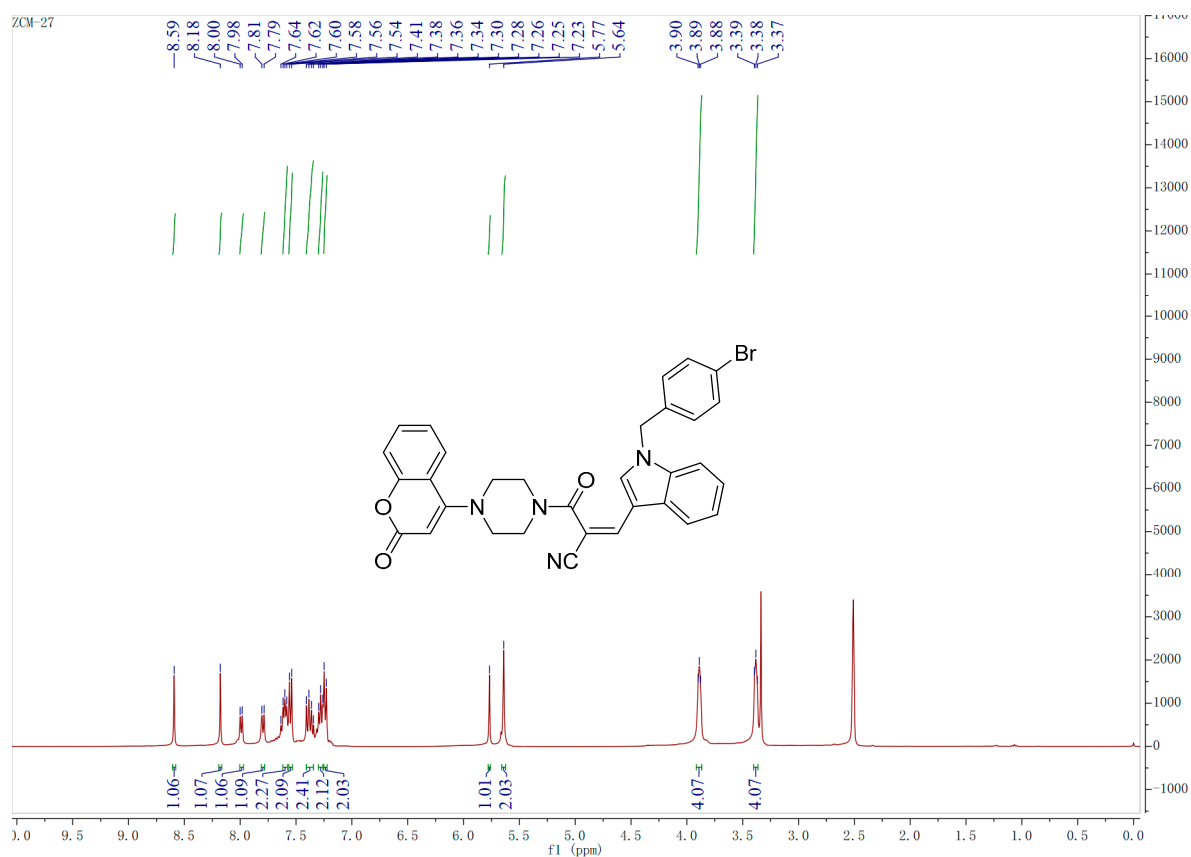

<sup>13</sup>C NMR spectrum (101 MHz, 25 °C, DMSO-*d*<sub>6</sub>)

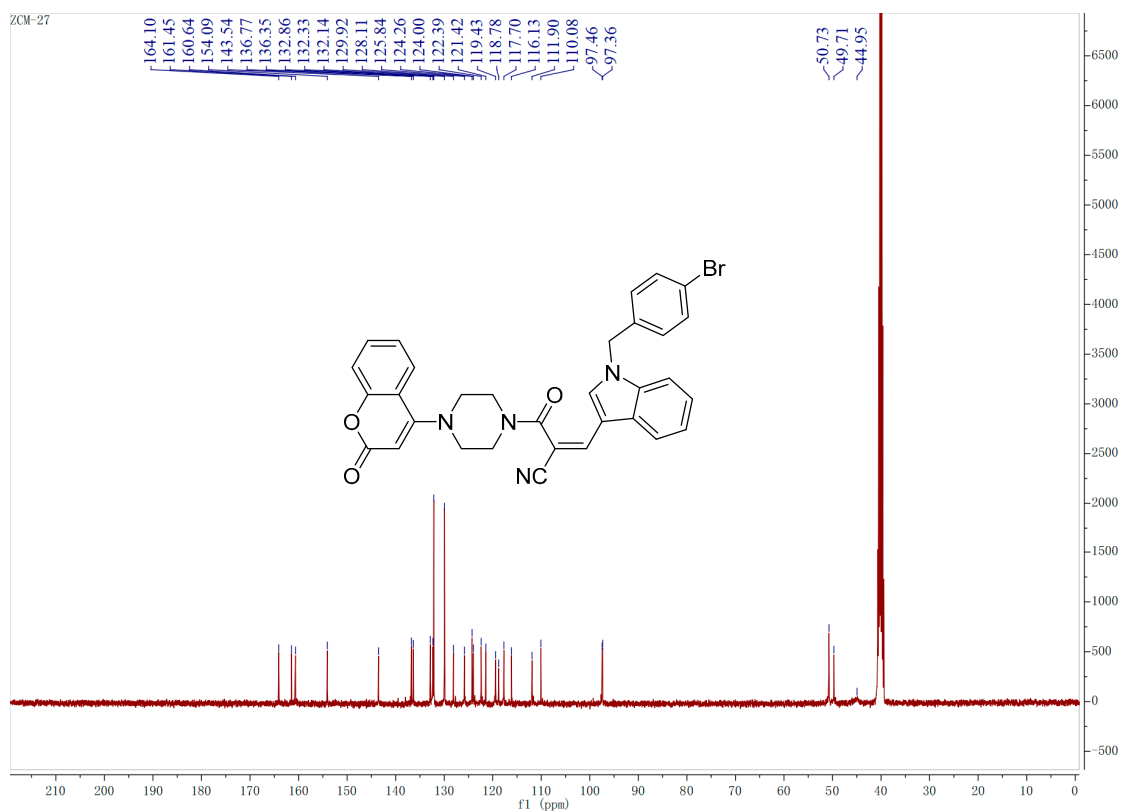

## HRMS spectrum

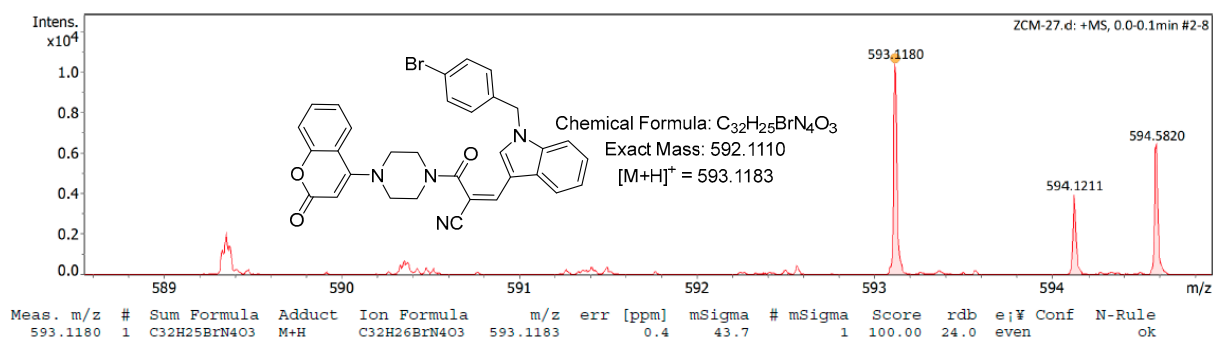

## 2.25. Spectra of compound 11h

$^1H$  NMR spectrum (400 MHz, 25 °C, DMSO- $d_6$ )

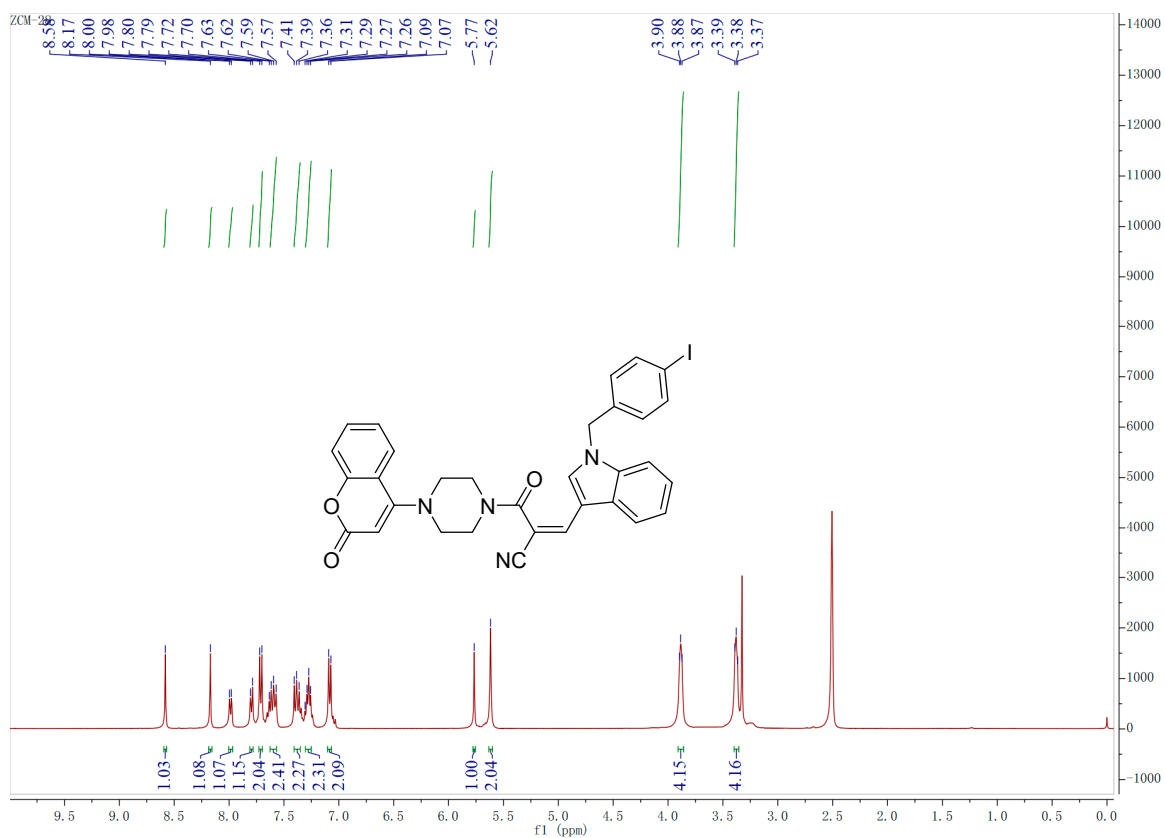

<sup>13</sup>C NMR spectrum (101 MHz, 25 °C, DMSO-*d*<sub>6</sub>)

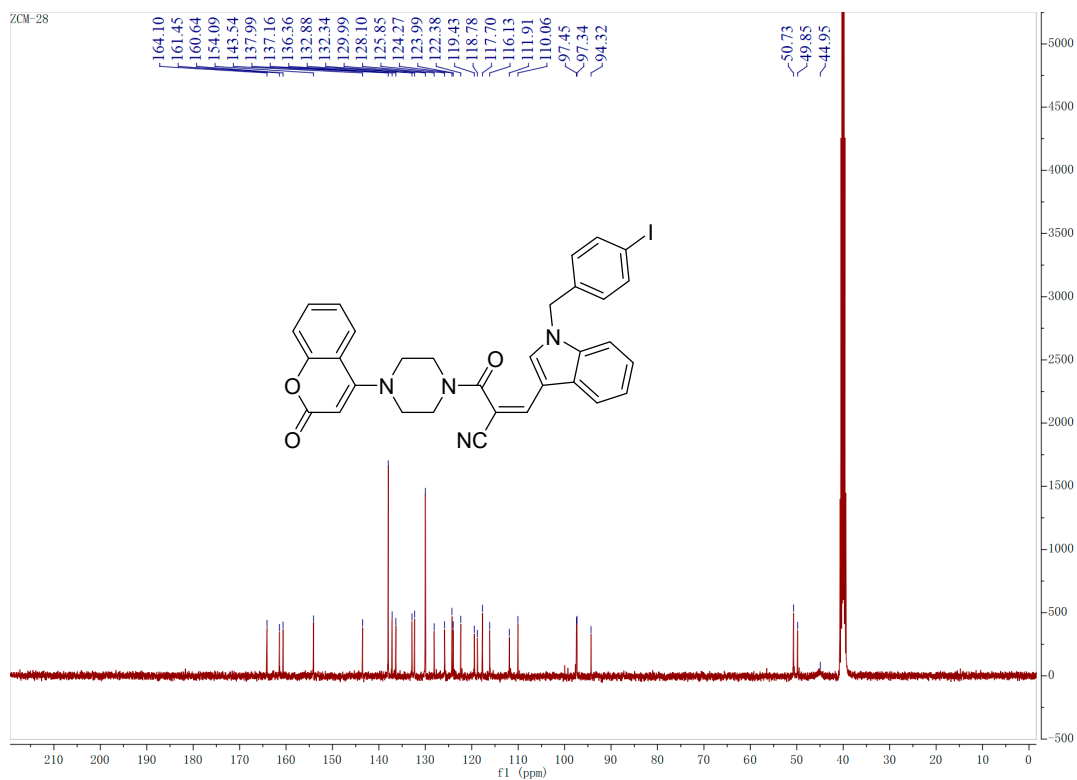

HRMS spectrum



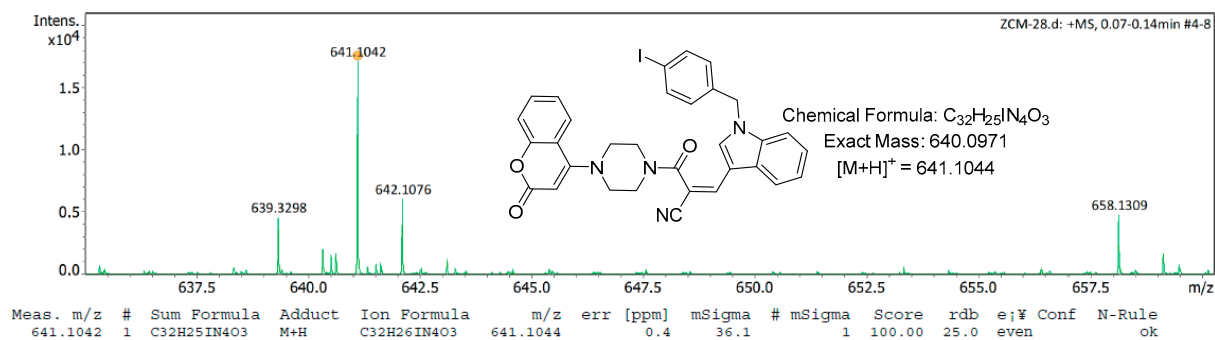

## 2.26. Spectra of compound 11i

<sup>1</sup>H NMR spectrum (600 MHz, 25 °C, DMSO-*d*<sub>6</sub>)

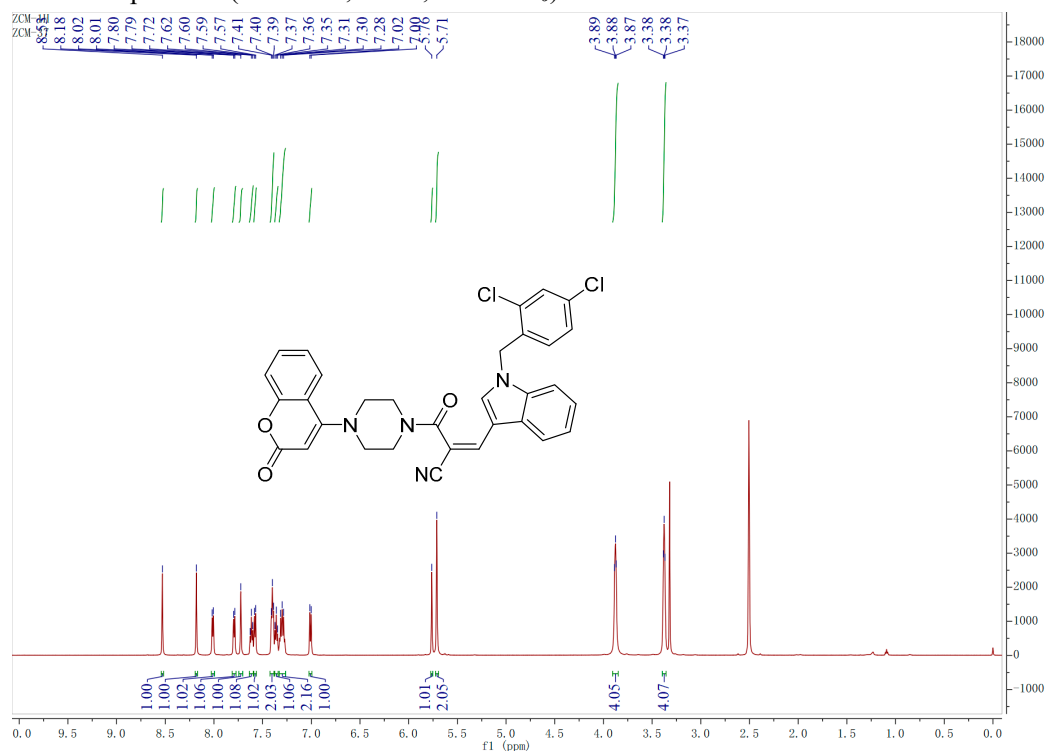

<sup>13</sup>C NMR spectrum (151 MHz, 25 °C, DMSO-*d*<sub>6</sub>)

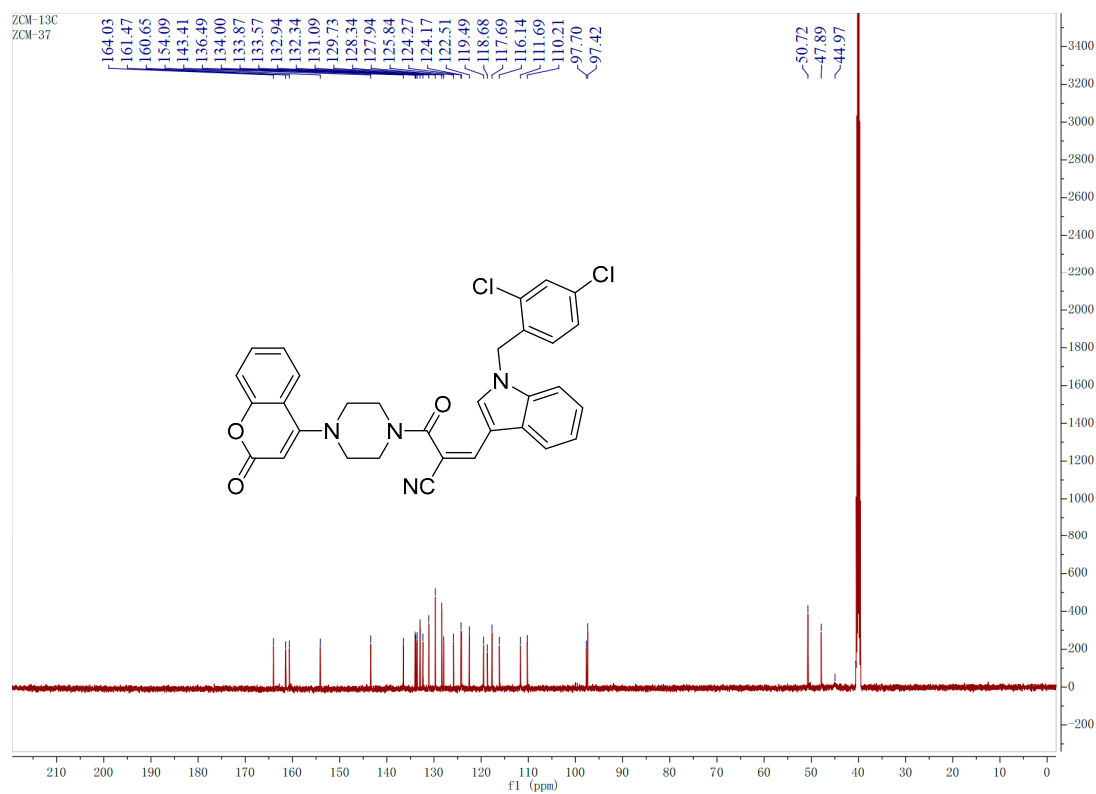

HRMS spectrum

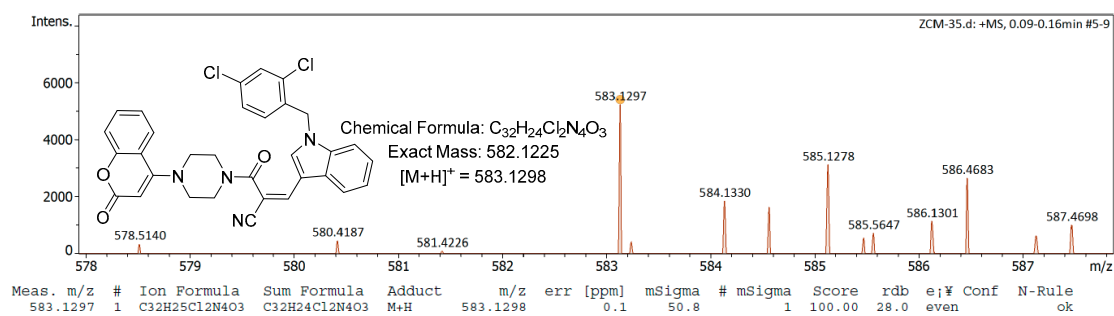

## 2.27. Spectra of compound 13a

<sup>1</sup>H NMR spectrum (600 MHz, 25 °C, DMSO-*d*<sub>6</sub>)

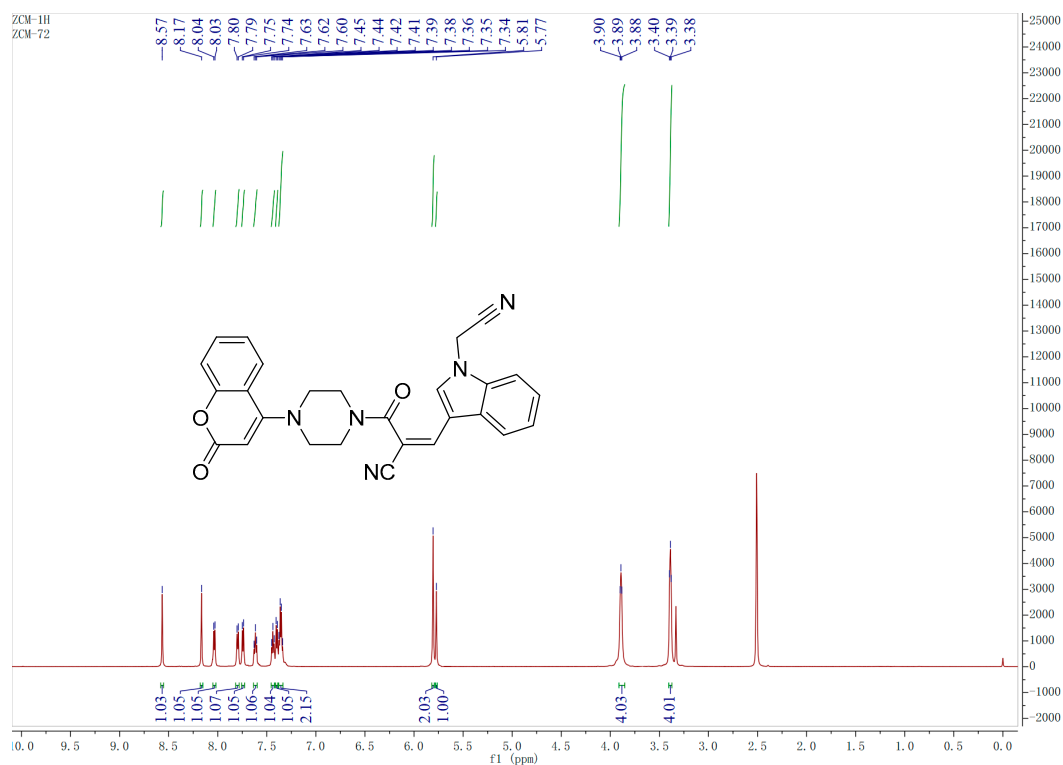

<sup>13</sup>C NMR spectrum (151 MHz, 25 °C, DMSO-*d*<sub>6</sub>)

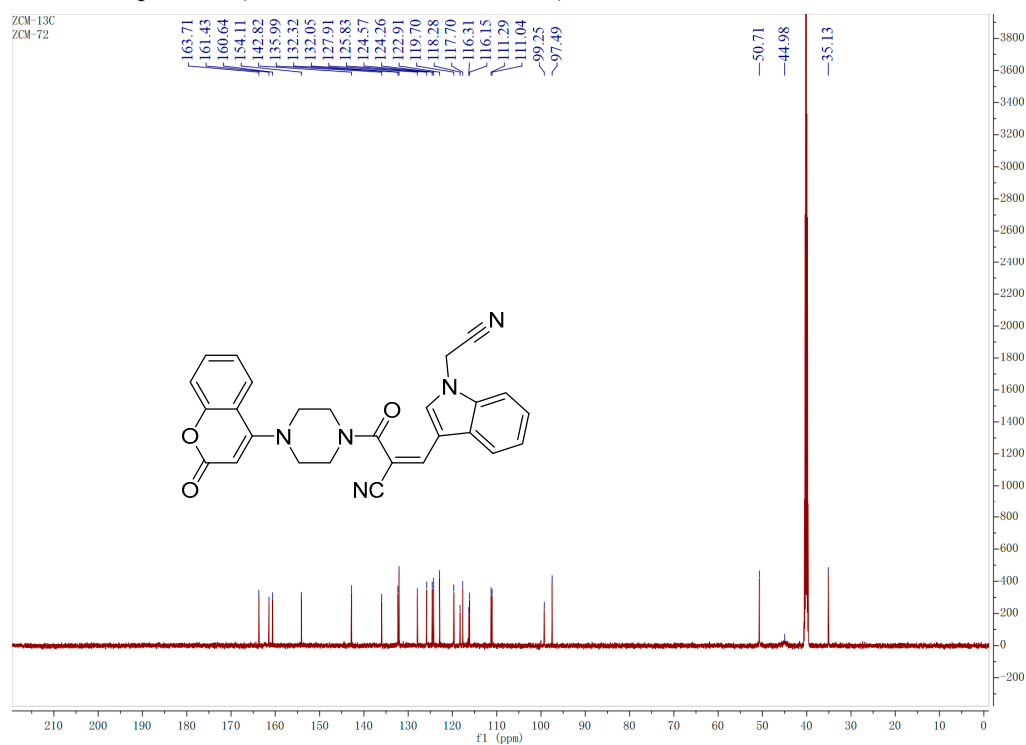

HRMS spectrum

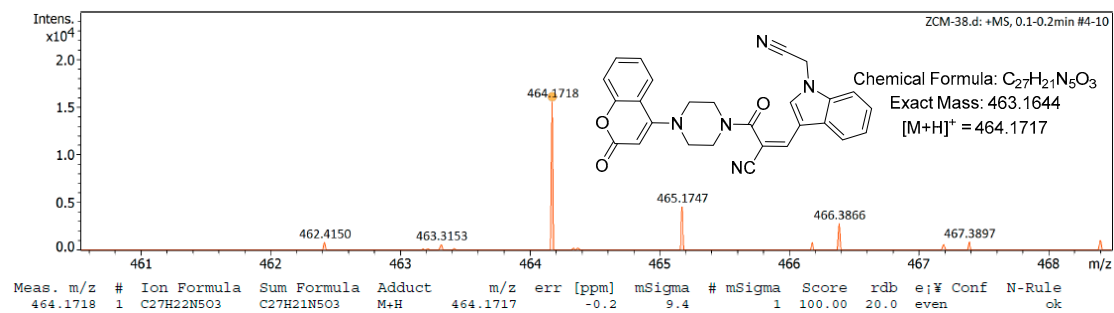

## 2.28. Spectra of compound 13b

<sup>1</sup>H NMR spectrum (600 MHz, 25 °C, DMSO-*d*<sub>6</sub>)

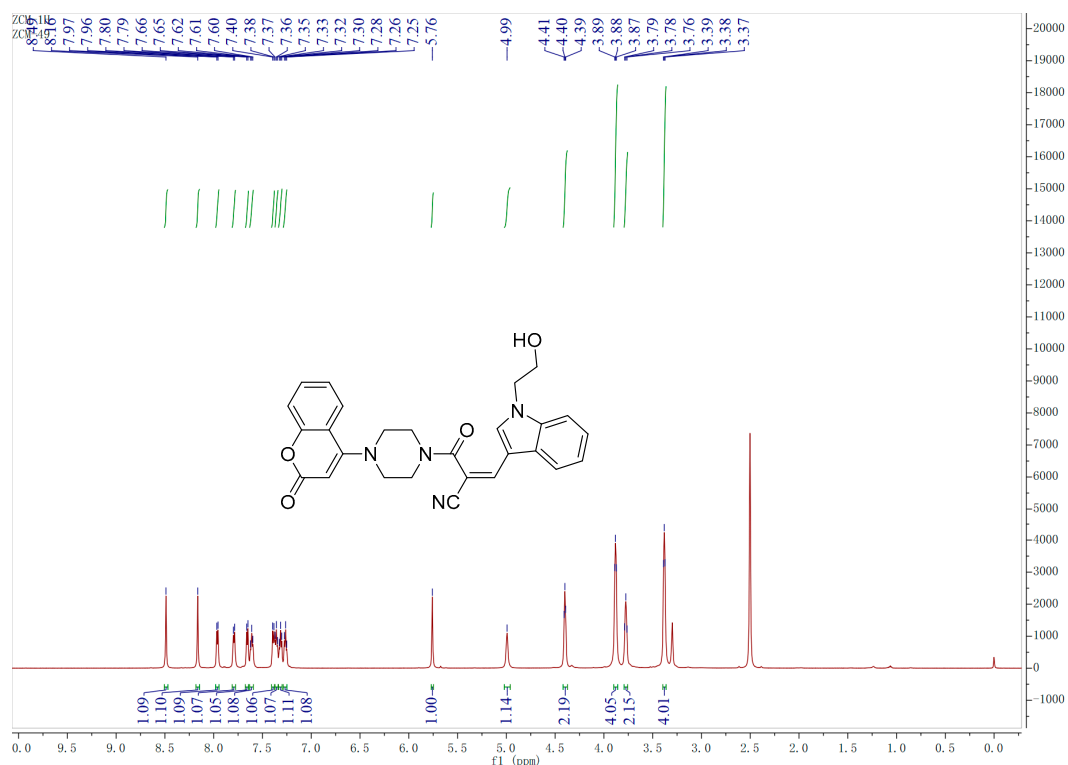

<sup>13</sup>C NMR spectrum (151 MHz, 25 °C, DMSO-*d*<sub>6</sub>)

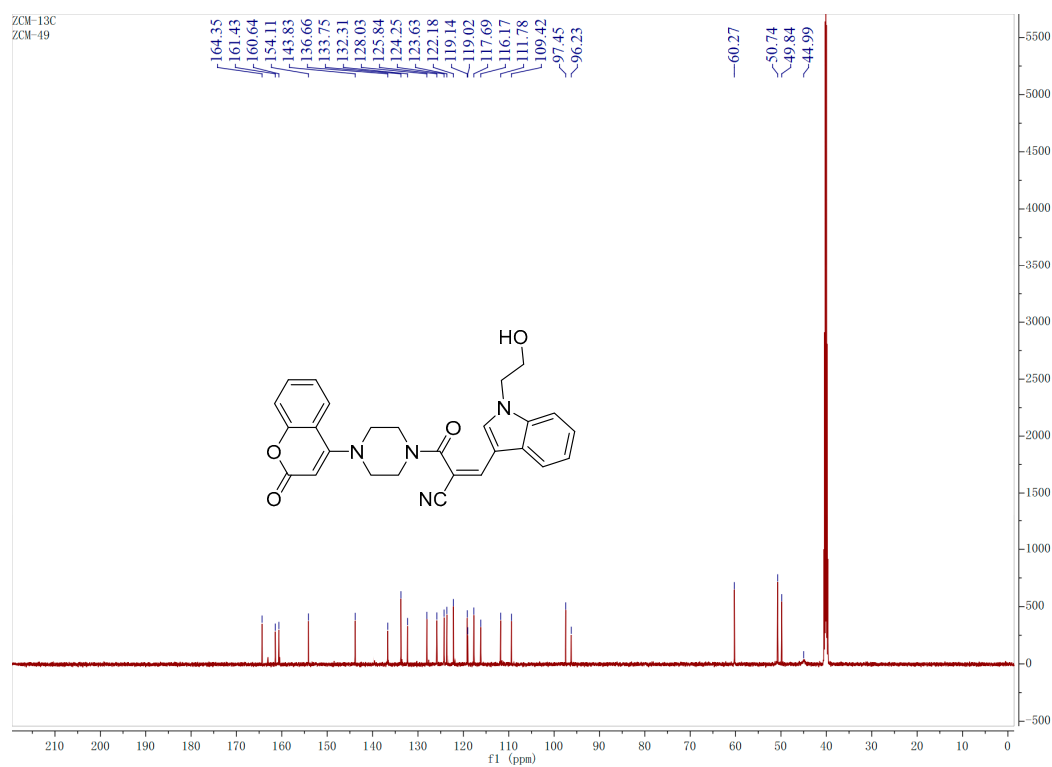

HMQC spectrum

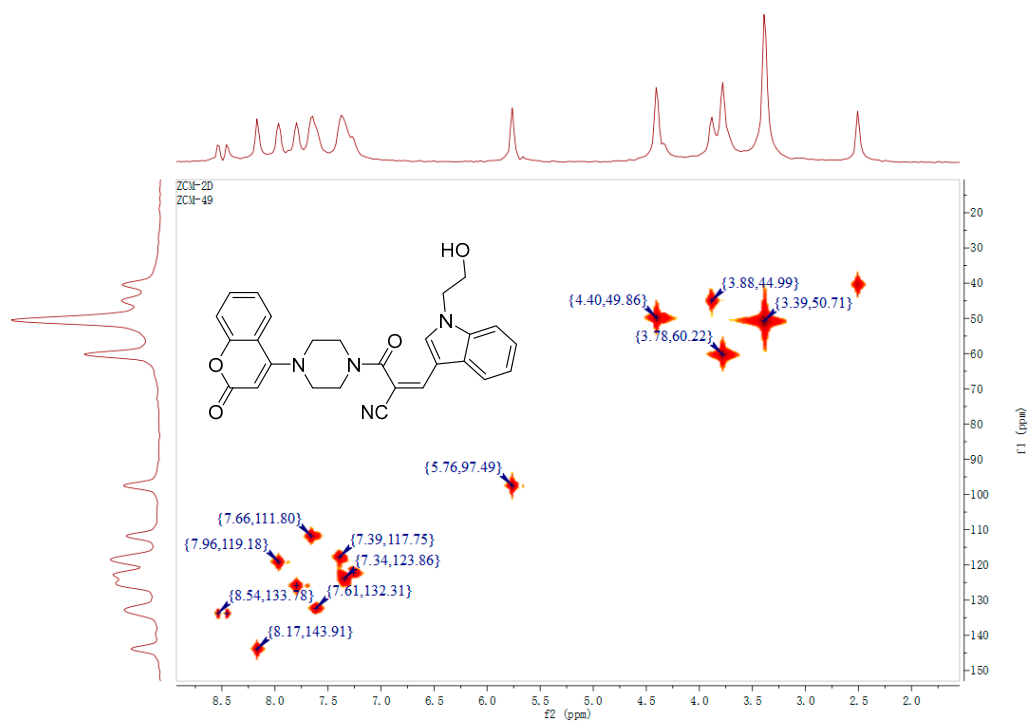

HRMS spectrum

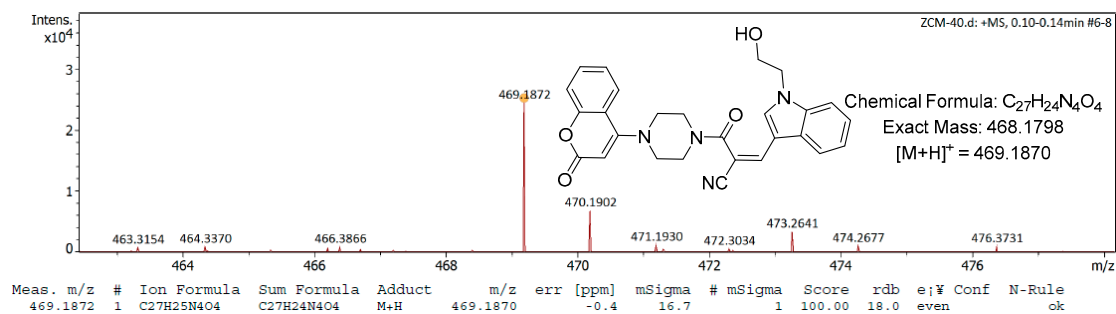

## 2.29. Spectra of compound 13c

<sup>1</sup>H NMR spectrum (600 MHz, 25 °C, DMSO-*d*<sub>6</sub>)

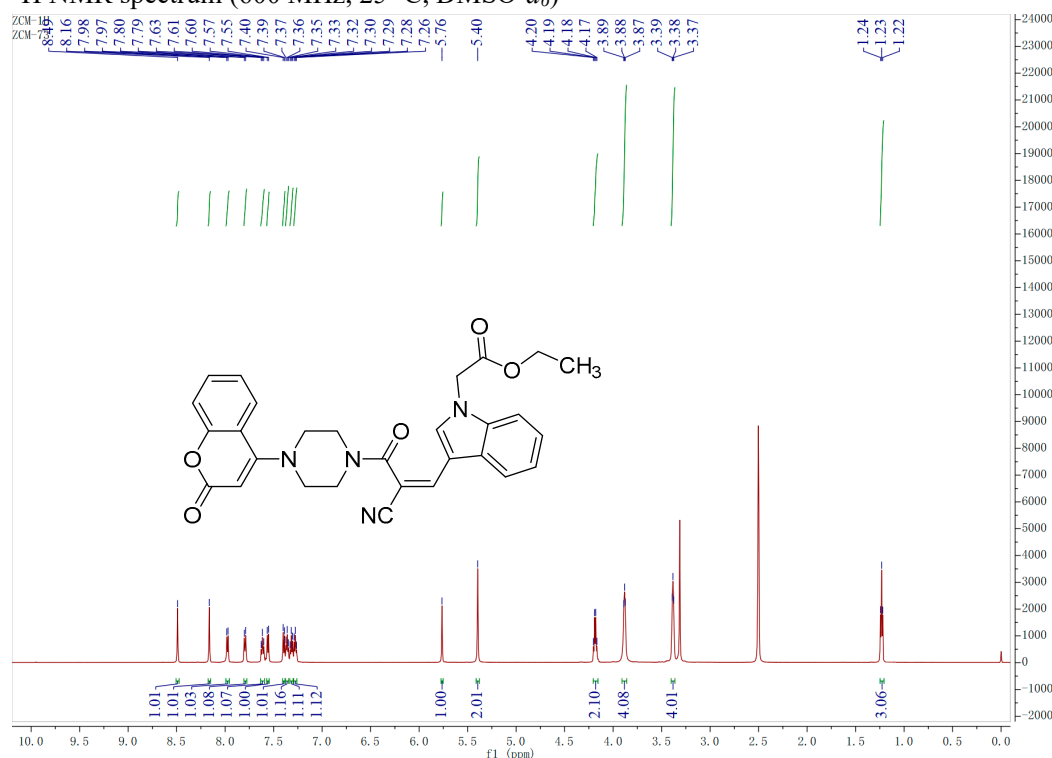

<sup>13</sup>C NMR spectrum (151 MHz, 25 °C, DMSO-*d*<sub>6</sub>)

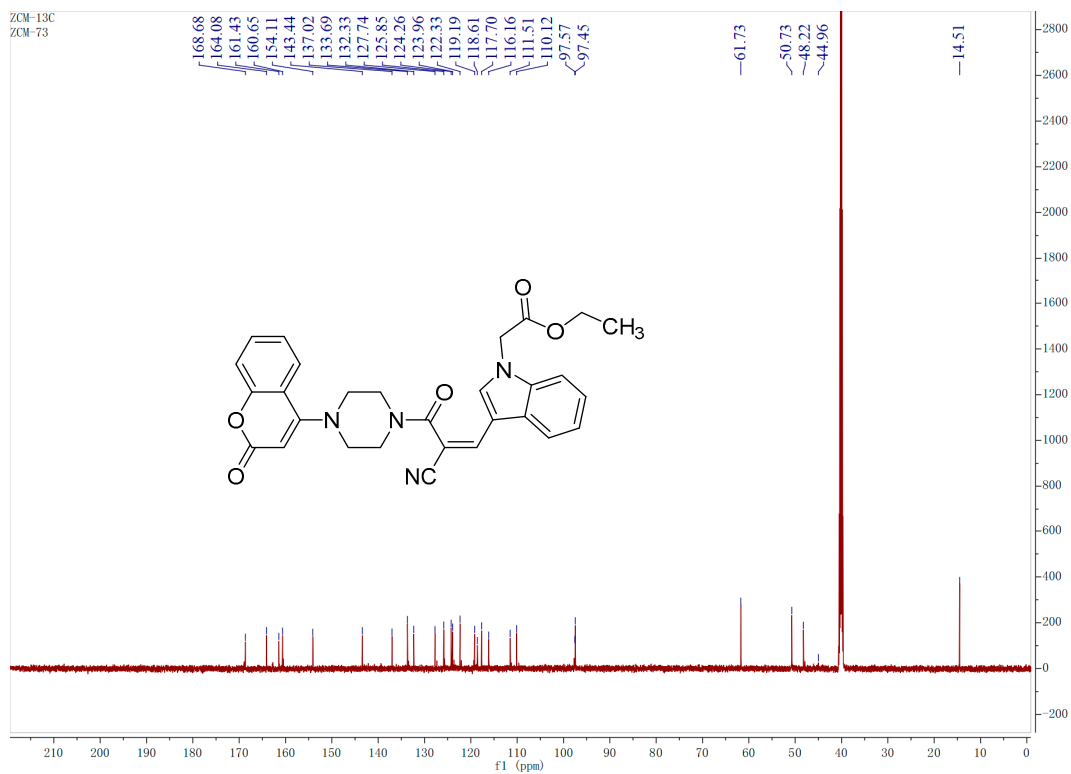

## HRMS spectrum

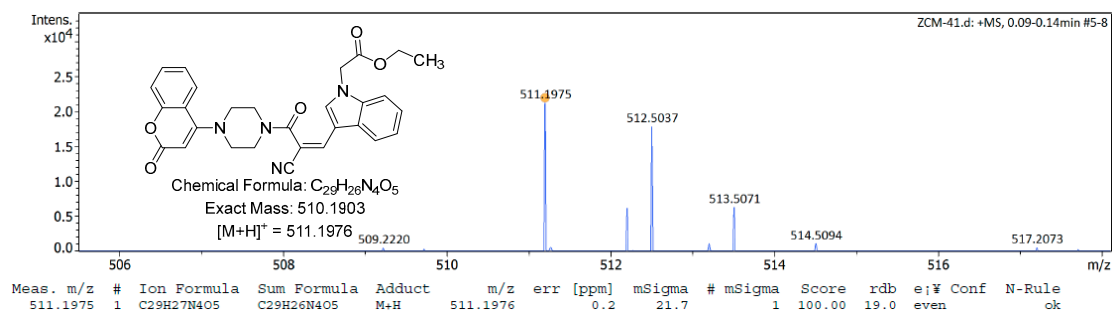

Supplement: s1 [file s1]
